# Supplementary material for: Antibiotic Treatment of Severe Exacerbations of Chronic Obstructive Pulmonary Disease with Procalcitonin: A Randomized Noninferiority Trial
Source: PubMed Central journal article supplement (PMC4356612; doi:10.1371/journal.pone.0118241), 2015-03-11
Supplement: pone.0118241.s004.pdf [file pone.0118241.s004.pdf]

# CONFIDENTIAL

## Case Report Form

### TITLE

**COMPARISON OF A SERUM PROCALCITONIN (PRO-CT)  
GUIDED TREATMENT PLAN WITH THE STANDARD  
GUIDELINE RECOMMENDED ANTIBIOTIC TREATMENT PLAN  
FOR PATIENTS HOSPITALIZED WITH A DIAGNOSIS OF  
EXACERBATION OF COPD**

Centre No.: | | | |

Patient's initials: | | | | | | | |  
Family name Name

Screening No.: | | | | | |  
Chronological patient no.

Randomisation No.: | | | | | |  
Randomisation no.

**FINAL VERSION: SEPTEMBER 27, 2006**

## **INSTRUCTIONS**

Please complete each form; date and sign the Investigator's Statement at the end of each visit as indicated in a legible manner.

The use of a black ball point pen is recommended.

If a change is necessary to any entry, cross it out with a single line, write in the correction and give reason for the change. Initial and date the correction.

Do not leave any questions unanswered. Please write the explanation beside any blank spaces.

## Flow chart

|                                          | Hospitalization  |                  |                                   |                                                   |                   |                   |                    |
|------------------------------------------|------------------|------------------|-----------------------------------|---------------------------------------------------|-------------------|-------------------|--------------------|
|                                          | Visit 1<br>Day 0 | Visit 2<br>Day 1 | Visit 3<br>Day 2<br>Randomisation | Visit 4<br>At hospital<br>discharge<br>e/o day 10 | Visit 5<br>Day 30 | Visit 6<br>Day 90 | Visit 7<br>Day 180 |
| <b>Informed Consent</b>                  | x                |                  |                                   |                                                   |                   |                   |                    |
| <b>Medical history</b>                   | x                |                  |                                   |                                                   |                   |                   |                    |
| <b>Physical examination</b>              | x                | x                | x                                 | x                                                 | x                 | x                 | x                  |
| <b>Vital signs</b>                       | x                | x                | x                                 | x                                                 | x                 | x                 | x                  |
| <b>Body temperature</b>                  | x                | x                | x                                 | x                                                 |                   |                   |                    |
| <b>Medication</b>                        | x                | x                | x                                 | x                                                 | x                 | x                 | x                  |
| <b>Pulmonary x-ray</b>                   | x                |                  |                                   |                                                   |                   |                   |                    |
| <b>Spirometry</b>                        | x                |                  |                                   | x                                                 | x                 | x                 | x                  |
| <b>Sputum collection</b>                 | x                |                  |                                   | x                                                 | x                 |                   | x                  |
| <b>ECG</b>                               | x                |                  |                                   |                                                   |                   |                   |                    |
| <b>Inclusion / exclusion criteria</b>    | x                |                  |                                   |                                                   |                   |                   |                    |
| <b>Questionnaire for quality of life</b> | x                |                  |                                   | x                                                 | x                 | x                 | x                  |
| <b>Pharmacoeconomy questionnaire</b>     | x                |                  |                                   | x                                                 | x                 | x                 | x                  |
| <b>Haematology</b>                       | x                |                  | x (if abnormal at day 0)          | x                                                 |                   | x                 |                    |
| <b>Blood chemistry</b>                   | x                |                  | x (if abnormal at day 0)          | x                                                 |                   | x                 |                    |
| <b>CRP, SAA and RANTES</b>               | x                | x                | x                                 | x                                                 | x                 | x                 | x                  |
| <b>PTX3 and IL-1 decoy</b>               | x                |                  |                                   | x                                                 |                   | x                 |                    |
| <b>Pro-ct levels</b>                     | x                | x                | x                                 | x                                                 | x                 | x                 | x                  |
| <b>Arterial blood gases</b>              | x                | x                | x                                 | x                                                 | x                 | x                 | x                  |
| <b>Treatment compliance</b>              | x                | x                | x                                 | x                                                 |                   |                   |                    |
| <b>Adverse event</b>                     | x                | x                | x                                 | x                                                 | x                 | x                 | x                  |

## Study Design

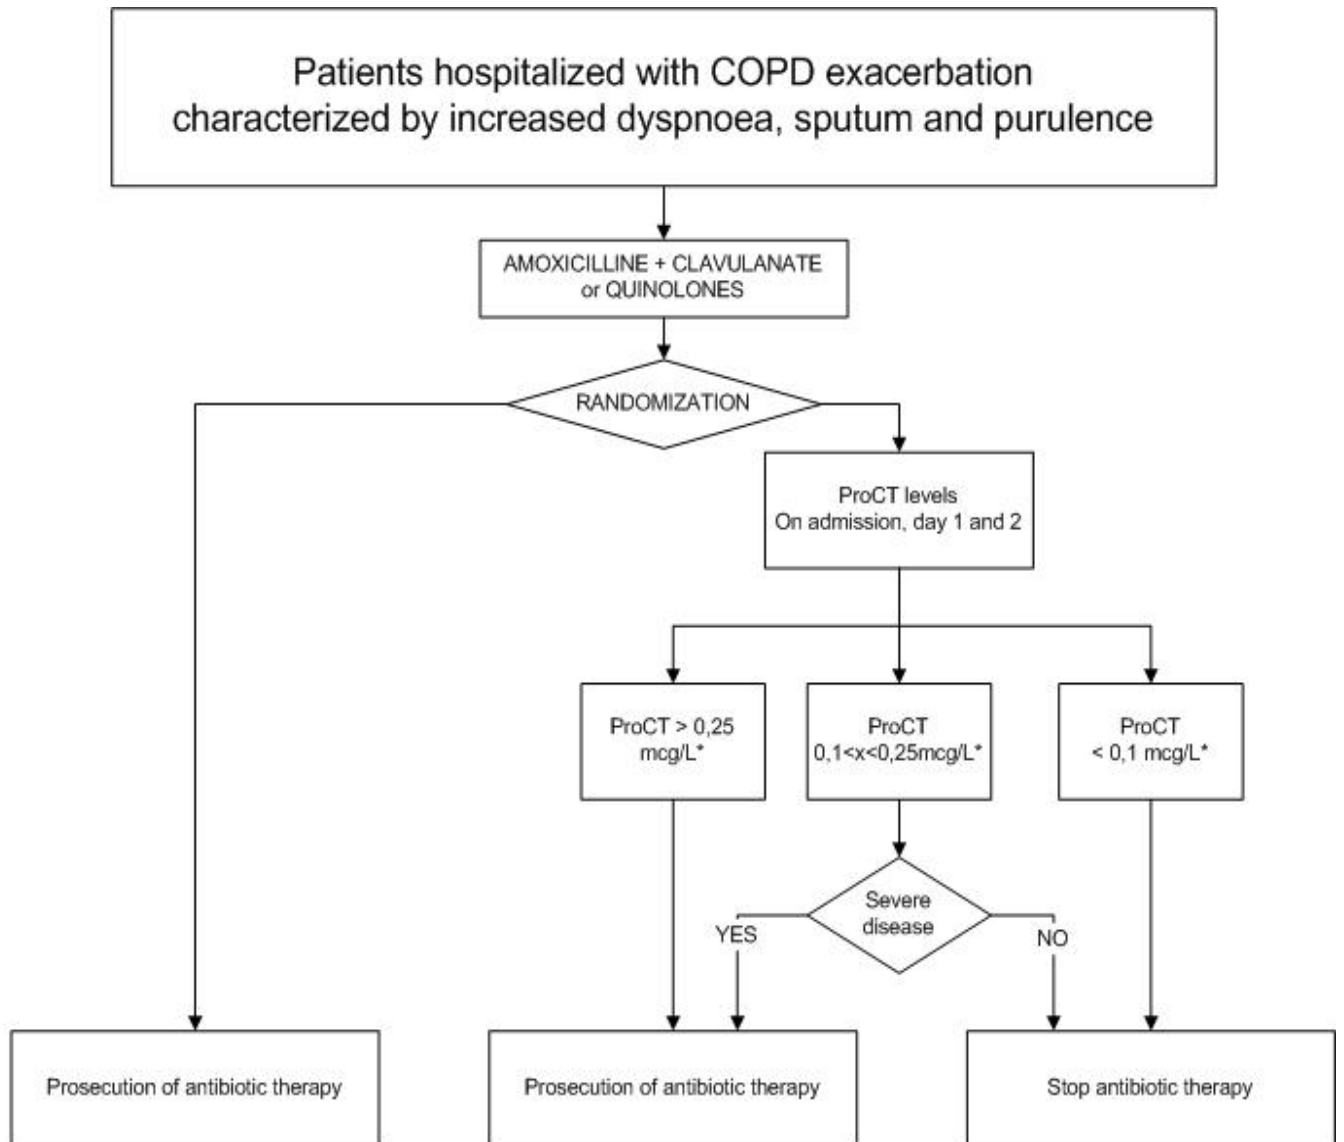

\* On admission, day 1 and day 2

## VISIT 1 – Day 0

Visit date |\_\_|\_\_|\_\_|\_\_| |\_\_|\_\_|\_\_|\_\_| |\_\_|\_\_|\_\_|\_\_| at |\_\_|\_\_|\_\_|\_\_| |\_\_|\_\_|\_\_|\_\_|  
D D M M Y Y HOUR MINUTES

### Participation agreement attestation:

I the undersigned, Doctor ....., certify that the patient's written informed consent form has been read, understood, approved and signed by the patient after having received information.

Date of written informed consent signature: |\_\_|\_\_|\_\_|\_\_| |\_\_|\_\_|\_\_|\_\_| |\_\_|\_\_|\_\_|\_\_|  
D D M M Y Y

Investigator's Signature: .....

***The informed consent form must be signed before any procedure related to the study.***

Centre No. | | | | | Screen. No. | | | | | Randomisation No. | | | | | Pat. Init. | | | | |  
Family name Name

## VISIT 1 – Day 0

Visit date | | | | | | | | | | | | | | | at | | | | | | | | | | | | | | |  
D D M M Y Y HOUR MINUTES

| <b>INCLUSION CRITERIA</b>                                                                                                                                                                                                                                | Yes                      | No                         |
|----------------------------------------------------------------------------------------------------------------------------------------------------------------------------------------------------------------------------------------------------------|--------------------------|----------------------------|
| 1. Male and female patients who give written informed consent                                                                                                                                                                                            | <input type="checkbox"/> | <input type="checkbox"/> * |
| 2. Age: adults > 18 years old                                                                                                                                                                                                                            | <input type="checkbox"/> | <input type="checkbox"/> * |
| 3. Diagnosis of COPD according to GOLD guidelines: FEV1/FVC < 70% with FEV1 < 80% of predicted                                                                                                                                                           | <input type="checkbox"/> | <input type="checkbox"/> * |
| 4. History of cigarette smoking                                                                                                                                                                                                                          | <input type="checkbox"/> | <input type="checkbox"/> * |
| 5. Diagnosis of COPD exacerbation: defined as acute-onset dyspnoea and/or cough associated with purulent sputum production (Anthonisen's criteria); requiring, according to guidelines (GOLD 2005), treatment with antibiotic; requiring hospitalisation | <input type="checkbox"/> | <input type="checkbox"/> * |
| <p><b>Any NO* leads to immediate exclusion from the study.</b><br/>           Fill in the "Investigator's statement" at the end of visit 1 and the "Study Conclusion Summary/Withdrawal/Drop-out Form".</p>                                              |                          |                            |

| <b>EXCLUSION CRITERIA</b>                                                                                                                                                                                                                                                                                                      | Yes                        | No                       | NA                       |
|--------------------------------------------------------------------------------------------------------------------------------------------------------------------------------------------------------------------------------------------------------------------------------------------------------------------------------|----------------------------|--------------------------|--------------------------|
| 1. Female subjects: pregnant, lactating mother or lack of efficient contraception in a subject with child-bearing potential (e.g. contraceptive methods other than oral contraceptives, IUD, tubal ligature)                                                                                                                   | <input type="checkbox"/> * | <input type="checkbox"/> | <input type="checkbox"/> |
| 2. Diagnosis of asthma                                                                                                                                                                                                                                                                                                         | <input type="checkbox"/> * | <input type="checkbox"/> |                          |
| 3. Coexisting medical conditions: unstable concomitant cardiovascular, renal, hepatic, gastrointestinal, neurological, endocrine, metabolic, musculo-skeletal, neoplastic, respiratory or other clinically significant disease (Patients with stable and well controlled hypertension or diabetes maybe included in the study) | <input type="checkbox"/> * | <input type="checkbox"/> |                          |
| 4. Clinical significant laboratory abnormalities indicating unstable concomitant disease                                                                                                                                                                                                                                       | <input type="checkbox"/> * | <input type="checkbox"/> |                          |
| 5. Patients in whom survival for at least 1 year is unlikely                                                                                                                                                                                                                                                                   | <input type="checkbox"/> * | <input type="checkbox"/> |                          |
| 6. Inability to give informed consent                                                                                                                                                                                                                                                                                          | <input type="checkbox"/> * | <input type="checkbox"/> |                          |
| <p><b>Any YES* leads to immediate exclusion from the study.</b><br/>           Fill in the "Investigator's statement" at the end of visit 1 and the "Study Conclusion Summary/Withdrawal/Drop-out Form".</p>                                                                                                                   |                            |                          |                          |

**VISIT 1 – Day 0**

Visit date |\_\_|\_\_|\_\_|\_\_| |\_\_|\_\_|\_\_|\_\_| |\_\_|\_\_|\_\_|\_\_| at |\_\_|\_\_|\_\_| |\_\_|\_\_|\_\_|\_\_|  
D D M M Y Y HOUR MINUTES

**DEMOGRAPHIC DATA**

Age |\_\_|\_\_| years old

Date of Birth |\_\_|\_\_|\_\_|\_\_| |\_\_|\_\_|\_\_|\_\_| |\_\_|\_\_|\_\_|\_\_|  
D D M M Y Y

Sex: 1)  Male

Height (cm) |\_\_|\_\_|\_\_|\_\_|. |\_\_|\_\_|

2)  Female

Weight (Kg) |\_\_|\_\_|\_\_|\_\_|. |\_\_|\_\_|

**If the patient is a female**

Is she of childbearing potential? 1)  No  
 2)  Yes

**1) If no:**

- 1) Post menopausal (two years after the last period)
- 2) Surgically sterilised
- 3) Other:

Specify: .....

**2) If yes:**

- 1) Tubal Ligature
- 2) Using oral oestro-progestatives
- 3) Using intra uterine-device (IUD)
- 4) Other:

Specify: .....

**Warning: female of childbearing potential must use an effective contraceptive method. If not, the patient cannot be randomised**

Centre No. | | | | | Screen. No. | | | | | Randomisation No. | | | | | Pat. Init. | | | | |  
Family name Name

**VISIT 1 – Day 0**

Visit date | | | | | | | | | | | | | | | at | | | | | | | | | | | | | | |  
D D M M Y Y HOUR MINUTES

**MEDICAL AND SURGICAL HISTORY AND CONCOMITANT DISEASES**

Does the patient have a relevant medical and/or surgical history, and/or relevant concomitant diseases? (including clinically significant laboratory values)  No  Yes\*

*\*If yes, fill in this table.*

| Medical or surgical history and/or concomitant diseases | Start Date<br>DD / MM / YY | End date<br>DD / MM / YY | On going                 |
|---------------------------------------------------------|----------------------------|--------------------------|--------------------------|
| 1. COPD                                                 |                            |                          | <input type="checkbox"/> |
| 2.                                                      |                            |                          | <input type="checkbox"/> |
| 3.                                                      |                            |                          | <input type="checkbox"/> |
| 4.                                                      |                            |                          | <input type="checkbox"/> |
| 5.                                                      |                            |                          | <input type="checkbox"/> |
| 6.                                                      |                            |                          | <input type="checkbox"/> |
| 7.                                                      |                            |                          | <input type="checkbox"/> |
| 8.                                                      |                            |                          | <input type="checkbox"/> |
| 9.                                                      |                            |                          | <input type="checkbox"/> |
| 10.                                                     |                            |                          | <input type="checkbox"/> |



Centre No. | | | | Screen. No. | | | | Randomisation No. | | | | Pat. Init. | | | | | |  
Family name Name

### VISIT 1 – Day 0

Visit date | | | | | | | | | | | | at | | | | | | | |  
D D M M Y Y HOUR MINUTES

### MEDICATION FOR CONDITIONS OTHER THAN COPD

Is the patient under ANY medication for any medical condition other than COPD?  Yes\*  No

***\*If YES please complete the following table, specifying ALL medication taken by the patient for ANY medical condition except COPD, at the time of enrolment in the study***

| Trade name | Indication | Posology |      | Route | Administration (DD/MM/YY) |                       |
|------------|------------|----------|------|-------|---------------------------|-----------------------|
|            |            | Dose/day | Unit |       | Start date                | End date (or ONGOING) |
|            |            |          |      |       |                           |                       |
|            |            |          |      |       |                           |                       |
|            |            |          |      |       |                           |                       |
|            |            |          |      |       |                           |                       |
|            |            |          |      |       |                           |                       |
|            |            |          |      |       |                           |                       |
|            |            |          |      |       |                           |                       |

### MEDICATION FOR STABLE COPD

Is the patient under pharmacologic treatment for stable COPD?  Yes\*  No

***\*If YES please complete the following table, specifying any medication taken by the patient for stable COPD, at the time of enrolment in the study***

| Trade name | Indication | Posology |      | Route | Administration (DD/MM/YY) |                       |
|------------|------------|----------|------|-------|---------------------------|-----------------------|
|            |            | Dose/day | Unit |       | Start date                | End date (or ONGOING) |
|            |            |          |      |       |                           |                       |
|            |            |          |      |       |                           |                       |
|            |            |          |      |       |                           |                       |
|            |            |          |      |       |                           |                       |

Centre No. | | | | | Screen. No. | | | | | Randomisation No. | | | | | Pat. Init. | | | | |  
Family name Name

## VISIT 1 – Day 0

Visit date | | | | | at | | | | |  
D D M M Y Y HOUR MINUTES

### HOME MEDICATION FOR THE CURRENT COPD EXACERBATION

Did the patient take ANY medication for the current COPD exacerbation before hospital admission (*for example, any antibiotics taken at home before hospital admission*)?

Yes\*       No

**\*If YES please complete the following table, specifying any medication taken by the patient for the current COPD exacerbation at home (before hospital admission)**

| Trade name | Indication | Posology |      | Route | Administration (DD/MM/YY) |                       |
|------------|------------|----------|------|-------|---------------------------|-----------------------|
|            |            | Dose/day | Unit |       | Start date                | End date (or ONGOING) |
|            |            |          |      |       |                           |                       |
|            |            |          |      |       |                           |                       |
|            |            |          |      |       |                           |                       |
|            |            |          |      |       |                           |                       |
|            |            |          |      |       |                           |                       |

### HISTORY OF CURRENT COPD EXACERBATION

Please indicate when the first sign/symptom of the current COPD exacerbation began (DD/MM/YY):

| | | | |

What were the characteristics of the current COPD exacerbation? Please indicate:

| Sign/symptom        |                                                             | Comments: |
|---------------------|-------------------------------------------------------------|-----------|
| 1. Fever            | <input type="checkbox"/> Yes<br><input type="checkbox"/> No |           |
| 2. Dyspnoea         | <input type="checkbox"/> Yes<br><input type="checkbox"/> No |           |
| 3. Cough            | <input type="checkbox"/> Yes<br><input type="checkbox"/> No |           |
| 4. Sputum           | <input type="checkbox"/> Yes<br><input type="checkbox"/> No |           |
| 5. Sputum purulence | <input type="checkbox"/> Yes<br><input type="checkbox"/> No |           |
| 6. Wheezing         | <input type="checkbox"/> Yes<br><input type="checkbox"/> No |           |
| 7. Other (specify)  | <input type="checkbox"/> Yes<br><input type="checkbox"/> No |           |

Centre No. | | | | Screen. No. | | | | Randomisation No. | | | | Pat. Init. | | | |  
Family name Name

## VISIT 1 – Day 0

Visit date | | | | | | | | | | at | | | | | |  
D D M M Y Y HOUR MINUTES

### PHYSICAL EXAMINATION

| Physical examination                | Status                                                                                                    | Comments: if "abnormal" specify: |
|-------------------------------------|-----------------------------------------------------------------------------------------------------------|----------------------------------|
| Cardiovascular system               | <input type="checkbox"/> Abnormal<br><input type="checkbox"/> Normal<br><input type="checkbox"/> Not done |                                  |
| Respiratory system<br>(except COPD) | <input type="checkbox"/> Abnormal<br><input type="checkbox"/> Normal<br><input type="checkbox"/> Not done |                                  |
| Lymphatic system                    | <input type="checkbox"/> Abnormal<br><input type="checkbox"/> Normal<br><input type="checkbox"/> Not done |                                  |
| Neurological-locomotor system       | <input type="checkbox"/> Abnormal<br><input type="checkbox"/> Normal<br><input type="checkbox"/> Not done |                                  |
| Skin                                | <input type="checkbox"/> Abnormal<br><input type="checkbox"/> Normal<br><input type="checkbox"/> Not done |                                  |
| Endocrine                           | <input type="checkbox"/> Abnormal<br><input type="checkbox"/> Normal<br><input type="checkbox"/> Not done |                                  |
| Ear-nose-throat system              | <input type="checkbox"/> Abnormal<br><input type="checkbox"/> Normal<br><input type="checkbox"/> Not done |                                  |
| Ophthalmological system             | <input type="checkbox"/> Abnormal<br><input type="checkbox"/> Normal<br><input type="checkbox"/> Not done |                                  |
| Gastrointestinal system             | <input type="checkbox"/> Abnormal<br><input type="checkbox"/> Normal<br><input type="checkbox"/> Not done |                                  |
| Others<br>.....                     | <input type="checkbox"/> Abnormal<br><input type="checkbox"/> Normal<br><input type="checkbox"/> Not done |                                  |

If an abnormality is clinically significant, please complete the 'Medical and surgical history and Concomitant Diseases' form on page 4.

Centre No. | | | | | Screen. No. | | | | | Randomisation No. | | | | | Pat. Init. | | | | |  
Family name Name

## VISIT 1 – Day 0

Visit date | | | | | | | | | | | | | | | at | | | | | | | | | | | | | | |  
D D M M Y Y HOUR MINUTES

### SMOKING HABITS

Information on the patient:

Never smoked

Former-smoker  Start date | | | | | | | | | | Stop date | | | | | | | | | |

Smoker  Start date | | | | | | | | | |

For former-smokers and smokers: Number packs year | | | |

☛ **Reminder:** 1 pack year = 20 cigarettes/day for 1 year or equivalent.

Calculation: PACK-YEARS =  $\frac{\text{(number of cigarettes smoked per day)} \times \text{(years smoked)}}{20}$

### VITAL SIGNS

Body temperature | | | | | . | | | | | °C

**SITTING BLOOD PRESSURE**  
(mmHg)

**SITTING HEART RATE**  
(bpm)

**Systolic**

**Diastolic**

| | | | |

| | | | |

| | | | |



### VISIT 1 – Day 0

Visit date |\_\_|\_\_|\_\_|\_\_|\_\_|\_\_|\_\_|\_\_| at |\_\_|\_\_|\_\_|\_\_|  
D D M M Y Y HOUR MINUTES

#### Pro-calcitonin (pro-ct)

Has the blood sample been taken for the pro-ct analysis?

Yes No

If Yes, refer to the Study Procedures Handbook for handling and storage.

If No, please specify why: \_\_\_\_\_

Please fill in as soon as the results are available:

Pro-calcitonin (mcg/L) |\_\_|\_\_|\_\_|\_\_|

#### C-reactive protein (CRP), serum amyloid (SAA) and RANTES

Has the blood sample been taken for the CRP, SAA and RANTES analysis?

Yes No

If Yes, refer to the Study Procedures Handbook for handling and storage.

If No, please specify why: \_\_\_\_\_

Please fill in as soon as the results are available:

CRP (mg/L) |\_\_|\_\_|\_\_|\_\_|

SAA (mg/L) |\_\_|\_\_|\_\_|\_\_|

RANTES (mcg/L) |\_\_|\_\_|\_\_|\_\_|

#### PTX-3 and IL1 decoy

Has the blood sample been taken for the PTX-3 and IL1 decoy analysis?

Yes No

If Yes, refer to the Study Procedures Handbook for handling and storage.

If No, please specify why: \_\_\_\_\_

Please fill in as soon as the results are available:

PTX-3 (ng/ml) |\_\_|\_\_|\_\_|\_\_|

IL1 decoy (ng/ml) |\_\_|\_\_|\_\_|\_\_|

Centre No. | | | | | Screen. No. | | | | | Randomisation No. | | | | | Pat. Init. | | | | |  
Family name Name

## VISIT 1 – Day 0

Visit date | | | | | | | | | | | | | | | at | | | | | | | | | | | | | | |  
D D M M Y Y HOUR MINUTES

### PULMONARY X-RAY

Has a pulmonary X-ray been obtained? Yes  No

If YES: X ray was: Normal  Abnormal

If "Abnormal", please specify:

\_\_\_\_\_

\_\_\_\_\_

If not obtained, specify why: \_\_\_\_\_

### QUESTIONNAIRES FOR RESPIRATORY SYMPTOMS/QUALITY OF LIFE

SF36 score: total | | | | |

BDI score: total | | | | |

TDI score: total | | | | |

CCIQ Score: total | | | | |

### PHARMACOECONOMIC QUESTIONNAIRE

Please remind to fill in the pharmacoeconomic questionnaire and enclose it in the plastic envelope.

### SPIROMETRY

- SPIROMETRY:** from 3 acceptable spirometric manoeuvres record the highest FEV<sub>1</sub> and FVC, irrespective of the manoeuvre (curve) they come from.

date | | | | | | | | | | | | | | | at | | | | | | | | | | | | | | |  
HOUR MINUTES

|                                                   |                                   |
|---------------------------------------------------|-----------------------------------|
| <b>FVC</b>                                        | ,           litre                 |
| <b>FEV<sub>1</sub></b>                            | ,           litre                 |
| <b>FEV<sub>1</sub> predicted normal value</b>     | ,           litre [ERS standards] |
| <b>FEV<sub>1</sub> (% predicted normal value)</b> | % of predicted value              |
| <b>FEV<sub>1</sub>/FVC (%)</b>                    | ,         %                       |

**VISIT 1 – Day 0**

Visit date |\_\_|\_\_|\_\_|\_\_|\_\_|\_\_|\_\_|\_\_|\_\_|\_\_| at |\_\_|\_\_|\_\_|\_\_|\_\_|\_\_|  
D D M M Y Y HOUR MINUTES

**MICROBIOLOGY**

Yes No

Sputum collection performed:

If YES, specify volume of sputum collected: |\_\_|,|\_\_| ml

If NO, specify why \_\_\_\_\_

Results from local laboratory:

**Bacteriology:**

Identified microorganism #1: \_\_\_\_\_ CFU/ml: |\_\_|\_\_|\_\_|\_\_|

Identified microorganism #2: \_\_\_\_\_ CFU/ml: |\_\_|\_\_|\_\_|\_\_|

Identified microorganism #3: \_\_\_\_\_ CFU/ml: |\_\_|\_\_|\_\_|\_\_|

**Serology for Intracellular pathogens:**

Has the sample for serology for intracellular pathogens been obtained? Yes  No

**If Yes, please complete below:**

Was serology positive for **Mycoplasma pneumoniae**? Yes  No

If YES, indicate: IgM: |\_\_|\_\_|\_\_|,|\_\_|\_\_|\_\_|

IgG: |\_\_|\_\_|\_\_|,|\_\_|\_\_|\_\_|

Was serology positive for **Chlamydia**? Yes  No

If YES, indicate: IgM: |\_\_|\_\_|\_\_|,|\_\_|\_\_|\_\_|

IgG: |\_\_|\_\_|\_\_|,|\_\_|\_\_|\_\_|

Was serology positive for **Legionella pneumophila**? Yes  No

If YES, indicate:

**POSITIVE                      NEGATIVE**

Legionella pneumophila IgM

Legionella pneumophila IgG



### VISIT 1 – Day 0

Visit date |\_\_|\_\_|\_\_|\_\_|\_\_|\_\_| at |\_\_|\_\_|\_\_|\_\_|\_\_|\_\_|  
D D M M Y Y HOUR MINUTES

### MICROBIOLOGY (continued)

Has the sample for **respiratory viruses RT-PCR analysis** been collected and stored at -80°C?

Yes  No

If **YES**, specify volume stored at -80°C for RT-PCR: |\_\_|,|\_\_|\_\_|\_\_| ml

*Please remember to label the sample with the patient's ID number and store it at -80°C, as described in the Study Procedures Handbook.*

Has the sample for **inflammatory cell counts** been collected? Yes  No

Were the slides prepared and stored at -20°C? Yes  No

If YES: how many slides were prepared? |\_\_|\_\_|

### ARTERIAL BLOOD GASES

|                                        | Yes                      | No                       |
|----------------------------------------|--------------------------|--------------------------|
| Arterial blood gas analysis performed: | <input type="checkbox"/> | <input type="checkbox"/> |

|                                                           |                          |                          |
|-----------------------------------------------------------|--------------------------|--------------------------|
| If <b>YES</b> : patient was under O <sub>2</sub> therapy? | <input type="checkbox"/> | <input type="checkbox"/> |
|-----------------------------------------------------------|--------------------------|--------------------------|

If patient was under O<sub>2</sub> therapy please indicate:

- how many L/min: |\_\_|,|\_\_|

- how many hours/day: |\_\_|\_\_|

If arterial blood gas analysis was performed, indicate:

pH: |\_\_|,|\_\_|\_\_|

PaO<sub>2</sub>: |\_\_|\_\_|\_\_| mmHg

PaCO<sub>2</sub>: |\_\_|\_\_|\_\_| mmHg

SO<sub>2</sub>: |\_\_|\_\_|\_\_| %

HCO<sub>3</sub><sup>-</sup>: |\_\_|\_\_|\_\_| mmol/L

Centre No. | | | | | Screen. No. | | | | | Randomisation No. | | | | | Pat. Init. | | | | |  
Family name Name

## VISIT 1 – Day 0

Visit date | | | | | | | | | | | | | | | at | | | | | | | | | | | | | | |  
D D M M Y Y HOUR MINUTES

### ECG (12-lead ECG)

Has an ECG recording been obtained? Yes  No

If No specify why: \_\_\_\_\_

If YES, please complete the following table and file the original ECG in the patient's file

| RECORDING                                                                                                                                                                                                   | COMMENTS (if any) |
|-------------------------------------------------------------------------------------------------------------------------------------------------------------------------------------------------------------|-------------------|
| Normal <input type="checkbox"/>                                                                                                                                                                             | _____             |
| Abnormal (not clinically significant) <input type="checkbox"/>                                                                                                                                              | _____             |
| Abnormal (clinically significant) <input type="checkbox"/><br><i>(In case of clinically significant abnormalities, complete the 'Medical and surgical history and Concomitant Diseases' form on page 4)</i> | _____             |

### ANTIBIOTIC TREATMENT ADMINISTRATION

- Indicate the antibiotic prescribed to the patient during the current hospitalization (choose one):

Amoxicilline + Clavulanate  OR Quinolones  (specify kind \_\_\_\_\_)

- Indicate route of administration (choose one): per os  intravenous

- record dosage of administered antibiotic: \_\_\_\_\_

- Indicate start date of antibiotic (DD/MM/YY): | | | | | | | | | | | | | | |

### HOSPITAL MEDICATION

*Please record in the following table ALL medication (steroid treatment, bronchodilators, any other therapy prescribed) to the patient during the current hospitalization (except antibiotic treatment, since it was already indicated above)*

| Trade name | Indication | Posology |      | Route | Administration (DD/MM/YY) |                       |
|------------|------------|----------|------|-------|---------------------------|-----------------------|
|            |            | Dose/day | Unit |       | Start date                | End date (or ONGOING) |
|            |            |          |      |       |                           |                       |
|            |            |          |      |       |                           |                       |
|            |            |          |      |       |                           |                       |
|            |            |          |      |       |                           |                       |
|            |            |          |      |       |                           |                       |
|            |            |          |      |       |                           |                       |
|            |            |          |      |       |                           |                       |
|            |            |          |      |       |                           |                       |

Centre No. | | | | | Screen. No. | | | | | Randomisation No. | | | | | Pat. Init. | | | | |  
Family name Name

## VISIT 1 – Day 0

Visit date | | | | | | | | | | | | | | | at | | | | | | | | | | | | | | |  
D D M M Y Y HOUR MINUTES

### ADVERSE EVENTS related to antibiotic treatment

Did any adverse event related to antibiotic treatment occur on day 0?

Yes  
 No

If Yes, please complete the appropriate “adverse event” page and report it immediately to the Direzione Sanitaria of the Hospital and to CROM (see Study Procedures Handbook for instructions).

### COMPLIANCE

Is patient compliant:                      Yes                      No  
                                             

If “No”, please specify:

---

---

### INVESTIGATOR’S STATEMENT

I confirm that the data herein is a true complete and accurate reflection of this subject participation in the study, according to the protocol procedures.

Investigator’s name: .....

Investigator’s signature: .....

Date:                      | | | | | | | | | | | | | | |  
D D M M Y Y

Centre No. | | | | | Screen. No. | | | | | Randomisation No. | | | | | Pat. Init. | | | | |  
Family name Name

## VISIT 2 – Day 1

Visit date | | | | | | | | | | | | | | | at | | | | | | | | | | | | | | |  
D D M M Y Y HOUR MINUTES

Has the patient withdrawn prematurely from the study?

Yes

No

If Yes, please fill in the “Investigator's statement” at the end of visit 2 and the “Study Conclusion Summary/Wihtdrawal/Drop-out Form”.

## ADVERSE EVENTS related to antibiotic treatment

Did any adverse event related to antibiotic treatment occur since the last visit?

Yes

No

If Yes, please complete the appropriate “adverse event” page and report it immediately to the Direzione Sanitaria of the Hospital and to CROM (see Study Procedures Handbook for instructions).



Centre No. | | | | | Screen. No. | | | | | Randomisation No. | | | | | Pat. Init. | | | | |  
Family name Name

**VISIT 2 – Day 1**

Visit date | | | | | at | | | | |  
D D M M Y Y HOUR MINUTES

**MEDICATION SINCE THE LAST VISIT**

Has any medication been instituted, stopped and/or modified (dose change) since the last visit?  No  Yes

*If YES please complete the following details, including only medications instituted, stopped and/or modified (dose change) since the last visit.*

| Trade name | Indication | Posology |      | Route | Administration (DD/MM/YY) |                       |
|------------|------------|----------|------|-------|---------------------------|-----------------------|
|            |            | Dose/day | Unit |       | Start date                | End date (or ONGOING) |
|            |            |          |      |       |                           |                       |
|            |            |          |      |       |                           |                       |
|            |            |          |      |       |                           |                       |
|            |            |          |      |       |                           |                       |
|            |            |          |      |       |                           |                       |
|            |            |          |      |       |                           |                       |
|            |            |          |      |       |                           |                       |
|            |            |          |      |       |                           |                       |
|            |            |          |      |       |                           |                       |

Centre No. | | | | | Screen. No. | | | | | Randomisation No. | | | | | Pat. Init. | | | | |  
Family name Name

**VISIT 2 – Day 1**

Visit date | | | | | at | | | | |  
D D M M Y Y HOUR MINUTES

**PHYSICAL EXAMINATION**

| Physical examination                | Status                                                                                                    | Comments: if "abnormal" specify: |
|-------------------------------------|-----------------------------------------------------------------------------------------------------------|----------------------------------|
| Cardiovascular system               | <input type="checkbox"/> Abnormal<br><input type="checkbox"/> Normal<br><input type="checkbox"/> Not done |                                  |
| Respiratory system<br>(except COPD) | <input type="checkbox"/> Abnormal<br><input type="checkbox"/> Normal<br><input type="checkbox"/> Not done |                                  |
| Lymphatic system                    | <input type="checkbox"/> Abnormal<br><input type="checkbox"/> Normal<br><input type="checkbox"/> Not done |                                  |
| Neurological-locomotor system       | <input type="checkbox"/> Abnormal<br><input type="checkbox"/> Normal<br><input type="checkbox"/> Not done |                                  |
| Skin                                | <input type="checkbox"/> Abnormal<br><input type="checkbox"/> Normal<br><input type="checkbox"/> Not done |                                  |
| Endocrine                           | <input type="checkbox"/> Abnormal<br><input type="checkbox"/> Normal<br><input type="checkbox"/> Not done |                                  |
| Ear-nose-throat system              | <input type="checkbox"/> Abnormal<br><input type="checkbox"/> Normal<br><input type="checkbox"/> Not done |                                  |
| Ophthalmological system             | <input type="checkbox"/> Abnormal<br><input type="checkbox"/> Normal<br><input type="checkbox"/> Not done |                                  |
| Gastrointestinal system             | <input type="checkbox"/> Abnormal<br><input type="checkbox"/> Normal<br><input type="checkbox"/> Not done |                                  |
| Others<br>.....                     | <input type="checkbox"/> Abnormal<br><input type="checkbox"/> Normal<br><input type="checkbox"/> Not done |                                  |

**VITAL SIGNS**

Body temperature | | | | |

| SITTING BLOOD PRESSURE<br>(mmHg) |           | SITTING HEART RATE<br>(bpm) |
|----------------------------------|-----------|-----------------------------|
| Systolic                         | Diastolic |                             |
|                                  |           |                             |

Centre No. |\_\_|\_\_|\_\_|\_\_| Screen. No. |\_\_|\_\_|\_\_|\_\_| Randomisation No. |\_\_|\_\_|\_\_|\_\_| Pat. Init. |\_\_|\_\_|\_\_|\_\_|  
Family name Name

## VISIT 2 – Day 1

Visit date |\_\_|\_\_|\_\_|\_\_|\_\_|\_\_|\_\_|\_\_|\_\_|\_\_| at |\_\_|\_\_|\_\_|\_\_|\_\_|\_\_|  
D D M M Y Y HOUR MINUTES

### Pro-calcitonin (pro-ct)

Has the blood sample been taken for the pro-ct analysis?

Yes No

If Yes, refer to the Study Procedures Handbook for handling and storage.

If No, please specify why: \_\_\_\_\_

Please fill in as soon as the results are available:

Pro-calcitonin (mcg/L) |\_\_|\_\_|\_\_|\_\_|

### C-reactive protein (CRP), serum amyloid (SAA) and RANTES

Has the blood sample been taken for the CRP, SAA and RANTES analysis?

Yes No

If Yes, refer to the Study Procedures Handbook for handling and storage.

If No, please specify why: \_\_\_\_\_

Please fill in as soon as the results are available:

CRP (mg/L) |\_\_|\_\_|\_\_|\_\_|

SAA (mg/L) |\_\_|\_\_|\_\_|\_\_|

RANTES (mcg/L) |\_\_|\_\_|\_\_|\_\_|



**VISIT 2 – Day 1**

Visit date |\_\_|\_\_|\_\_|\_\_|\_\_|\_\_|\_\_|\_\_|\_\_|\_\_| at |\_\_|\_\_|\_\_|\_\_|  
D D M M Y Y HOUR MINUTES

**ARTERIAL BLOOD GASES**

|                                                              | Yes                      | No                       |
|--------------------------------------------------------------|--------------------------|--------------------------|
| Arterial blood gas analysis performed:                       | <input type="checkbox"/> | <input type="checkbox"/> |
| If <b>YES</b> : patient was under O <sub>2</sub> therapy?    | <input type="checkbox"/> | <input type="checkbox"/> |
| If patient was under O <sub>2</sub> therapy please indicate: |                          |                          |
| - how many L/min:  __ , __                                   |                          |                          |
| - how many hours/day:  __ __                                 |                          |                          |

If arterial blood gas analysis was performed, indicate:

pH: |\_\_|,|\_\_|\_\_|

PaO<sub>2</sub>: |\_\_|\_\_|\_\_| mmHg

PaCO<sub>2</sub>: |\_\_|\_\_|\_\_| mmHg

SO<sub>2</sub>: |\_\_|\_\_|\_\_| %

HCO<sub>3</sub><sup>-</sup>: |\_\_|\_\_|\_\_| mmol/L

**COMPLIANCE**

|                       | Yes                      | No                       |
|-----------------------|--------------------------|--------------------------|
| Is patient compliant: | <input type="checkbox"/> | <input type="checkbox"/> |

If "No", please specify:

---



---

**INVESTIGATOR'S STATEMENT**

I confirm that the data herein is a true complete and accurate reflection of this subject participation in the study, according to the protocol procedures.

Investigator's name: .....

Investigator's signature: .....

Date: |\_\_|\_\_|\_\_|\_\_|\_\_|\_\_|\_\_|\_\_|\_\_|\_\_|  
D D M M Y Y

Centre No. | | | | | Screen. No. | | | | | Randomisation No. | | | | | Pat. Init. | | | | |  
Family name Name

## VISIT 3 – Day 2

Visit date | | | | | | | | | | | | | | | at | | | | | | | | | | | | | | |  
D D M M Y Y HOUR MINUTES

Has the patient withdrawn prematurely from the study?

Yes

No

If Yes, please fill in the “Investigator’s statement” at the end of visit 3 and the “Study Conclusion Summary/Wihtdrawal/Drop-out Form”.

## ADVERSE EVENTS related to antibiotic treatment

Did any adverse event related to antibiotic treatment occur since the last visit?

Yes

No

If Yes, please complete the appropriate “adverse event” page and report it immediately to the Direzione Sanitaria of the Hospital and to CROM (see Study Procedures Handbook for instructions).

**VISIT 3 – Day 2**

Visit date | | | | | | | | | | | | | | | at | | | | | | | | | | | | | | |  
D D M M Y Y HOUR MINUTES

**OCCURRING EVENTS**

**PLEASE COMPLETE THE FOLLOWING TABLE:**

|                                                                                                                                                                                                                |                                                              |                                                                                                                                                                                                                                                             |
|----------------------------------------------------------------------------------------------------------------------------------------------------------------------------------------------------------------|--------------------------------------------------------------|-------------------------------------------------------------------------------------------------------------------------------------------------------------------------------------------------------------------------------------------------------------|
| <p>Did the patient require <u>ventilatory support</u> since the last visit?</p> <p><i>*If YES: please add ventilatory support information in the "medication since the last visit" section on page 24.</i></p> | <input type="checkbox"/> Yes*<br><input type="checkbox"/> No | <p>If YES, specify reason(s) for ventilatory support need:<br/>         _____</p> <p>If YES, please indicate date when ventilatory support began since last visit (DD/MM/YY):<br/>                                      </p>                                |
| <p>Was the patient admitted to an Intensive Care Unit <u>for any cause</u> since the last visit?</p>                                                                                                           | <input type="checkbox"/> Yes<br><input type="checkbox"/> No  | <p>If YES, specify reason(s) for admission to ICU:<br/>         _____</p> <p>If YES, please indicate date of admission to ICU since last visit (DD/MM/YY):<br/>                                      </p>                                                   |
| <p>Did the patient have any episode(s) of <u>pulmonary embolism</u> since the last visit?</p>                                                                                                                  | <input type="checkbox"/> Yes<br><input type="checkbox"/> No  | <p>If YES indicate date of onset of pulmonary embolism since last visit (DD/MM/YY):<br/>                                      </p>                                                                                                                          |
| <p>Did the patient have any <u>cardiovascular events, including acute onset pulmonary edema</u> since the last visit?</p>                                                                                      | <input type="checkbox"/> Yes<br><input type="checkbox"/> No  | <p>If YES, specify kind of cardiovascular event(s):<br/>         _____</p> <p>If YES indicate date(s) of onset of new event(s) since last visit (DD/MM/YY):<br/>         1)                              <br/>         2)                              </p> |
| <p>Did the patient have any episodes of <u>pneumonia</u> since the last visit?</p>                                                                                                                             | <input type="checkbox"/> Yes<br><input type="checkbox"/> No  | <p>If YES indicate date of onset of pneumonia since last visit (DD/MM/YY):<br/>                                      </p>                                                                                                                                   |
| <p>Did the patient have <u>any other significant occurring event</u> since the last visit?</p>                                                                                                                 | <input type="checkbox"/> Yes<br><input type="checkbox"/> No  | <p>If YES, specify event(s):<br/>         _____</p> <p>If YES indicate date(s) of onset of new event(s) since last visit (DD/MM/YY):<br/>         1)                              <br/>         2)                              </p>                        |

**Has the patient experienced at least one of the above events since the last visit (i.e. did you answer YES to any of the above questions)?**

No  Yes\*

\* If YES please fax a copy of this page to CROM as indicated in the Study Procedures Handbook.

Centre No. | | | | | Screen. No. | | | | | Randomisation No. | | | | | Pat. Init. | | | | |  
Family name Name

**VISIT 3 – Day 2**

Visit date | | | | | at | | | | |  
D D M M Y Y HOUR MINUTES

**MEDICATION SINCE THE LAST VISIT**

Has any medication been instituted, stopped and/or modified (dose change) since the last visit?  No  Yes

*If YES please complete the following details, including only medications instituted, stopped and/or modified (dose change) since the last visit.*

| Trade name | Indication | Posology |      | Route | Administration (DD/MM/YY) |                       |
|------------|------------|----------|------|-------|---------------------------|-----------------------|
|            |            | Dose/day | Unit |       | Start date                | End date (or ONGOING) |
|            |            |          |      |       |                           |                       |
|            |            |          |      |       |                           |                       |
|            |            |          |      |       |                           |                       |
|            |            |          |      |       |                           |                       |
|            |            |          |      |       |                           |                       |
|            |            |          |      |       |                           |                       |
|            |            |          |      |       |                           |                       |
|            |            |          |      |       |                           |                       |
|            |            |          |      |       |                           |                       |

Centre No. | | | | | Screen. No. | | | | | Randomisation No. | | | | | Pat. Init. | | | | |  
Family name Name

## VISIT 3 – Day 2

Visit date | | | | | at | | | | |  
D D M M Y Y HOUR MINUTES

### PHYSICAL EXAMINATION

| Physical examination                | Status                                                                                                    | Comments: if "abnormal" specify: |
|-------------------------------------|-----------------------------------------------------------------------------------------------------------|----------------------------------|
| Cardiovascular system               | <input type="checkbox"/> Abnormal<br><input type="checkbox"/> Normal<br><input type="checkbox"/> Not done |                                  |
| Respiratory system<br>(except COPD) | <input type="checkbox"/> Abnormal<br><input type="checkbox"/> Normal<br><input type="checkbox"/> Not done |                                  |
| Lymphatic system                    | <input type="checkbox"/> Abnormal<br><input type="checkbox"/> Normal<br><input type="checkbox"/> Not done |                                  |
| Neurological-locomotor system       | <input type="checkbox"/> Abnormal<br><input type="checkbox"/> Normal<br><input type="checkbox"/> Not done |                                  |
| Skin                                | <input type="checkbox"/> Abnormal<br><input type="checkbox"/> Normal<br><input type="checkbox"/> Not done |                                  |
| Endocrine                           | <input type="checkbox"/> Abnormal<br><input type="checkbox"/> Normal<br><input type="checkbox"/> Not done |                                  |
| Ear-nose-throat system              | <input type="checkbox"/> Abnormal<br><input type="checkbox"/> Normal<br><input type="checkbox"/> Not done |                                  |
| Ophthalmological system             | <input type="checkbox"/> Abnormal<br><input type="checkbox"/> Normal<br><input type="checkbox"/> Not done |                                  |
| Gastrointestinal system             | <input type="checkbox"/> Abnormal<br><input type="checkbox"/> Normal<br><input type="checkbox"/> Not done |                                  |
| Others<br>.....                     | <input type="checkbox"/> Abnormal<br><input type="checkbox"/> Normal<br><input type="checkbox"/> Not done |                                  |

### VITAL SIGNS

Body temperature | | | | |

| SITTING BLOOD PRESSURE<br>(mmHg) |           | SITTING HEART RATE<br>(bpm) |
|----------------------------------|-----------|-----------------------------|
| Systolic                         | Diastolic |                             |
|                                  |           |                             |

Centre No. | | | | | Screen. No. | | | | | Randomisation No. | | | | | Pat. Init. | | | | |  
Family name Name

## VISIT 3 – Day 2

Visit date | | | | | | | | | | | | | | | at | | | | | | | | | | | | | | |  
D D M M Y Y HOUR MINUTES

### LABORATORY TESTS

Collect blood sample for haematology and blood chemistry.  
 (LOCAL LABORATORY) - Only those parameters (if any) which were abnormal at Visit 1

| Haematology tests *              |                   | Clinically Significant ** |    |   |
|----------------------------------|-------------------|---------------------------|----|---|
|                                  |                   | Yes                       | No |   |
| Haemoglobin (mmol/L)             | _ _ _ . _ _       | _                         | _  |   |
| Haematocrit (L/L)                | _ . _ _           | _                         | _  |   |
| RBC ( $10^{12}/L$ )              | _ . _ _           | _                         | _  |   |
| WBC ( $10^9/L$ )                 | _ _ _ . _ _       | _                         | _  |   |
| WBC (differential counts)        | Neutrophils (%)   | _ _ _ . _ _               | _  | _ |
|                                  | Eosinophils (%)   | _ . _ _                   | _  | _ |
|                                  | Basophils (%)     | _ . _ _                   | _  | _ |
|                                  | Monocytes (%)     | _ _ _ . _ _               | _  | _ |
|                                  | Lymphocytes (%)   | _ _ _ . _ _               | _  | _ |
| Platelet ( $10^9/L$ )            | _ _ _ _           | _                         | _  |   |
| <b>Blood Chemistry tests *</b>   |                   |                           |    |   |
| Alkaline Phosphatase (U/L)       | _ _ _ _ _ _ _ _ _ | _                         | _  |   |
| AST (SGOT) (U/L)                 | _ _ _ _ _ _ _ _ _ | _                         | _  |   |
| ALT (SGPT) (U/L)                 | _ _ _ _ _ _ _ _ _ | _                         | _  |   |
| BUN/blood urea (mmol/L)          | _ _ _ _ _ _ _ _ _ | _                         | _  |   |
| Creatinine Kinase (U/L)          | _ _ _ _ _ _ _ _ _ | _                         | _  |   |
| Creatinine ( $\mu\text{mol}/L$ ) | _ _ _ _ _ _ _ _ _ | _                         | _  |   |
| Gamma-GT (U/L)                   | _ _ _ _ _ _ _ _ _ | _                         | _  |   |
| Sodium (mmol/L)                  | _ _ _ _ _ _ _ _ _ | _                         | _  |   |
| Potassium (mmol/L)               | _ _ _ _ _ _ _ _ _ | _                         | _  |   |
| Glucose (mmol/L)                 | _ _ _ _ _ _ _ _ _ | _                         | _  |   |

\* to be filled in as soon as results are available

\*\* For the out of range values, please specify if the abnormality is clinically or not clinically significant

**Laboratory results need to be stored in the patient's file**

Centre No. |\_\_|\_\_|\_\_|\_\_| Screen. No. |\_\_|\_\_|\_\_|\_\_| Randomisation No. |\_\_|\_\_|\_\_|\_\_| Pat. Init. |\_\_|\_\_|\_\_|\_\_|  
Family name Name

## VISIT 3 – Day 2

Visit date |\_\_|\_\_|\_\_|\_\_|\_\_|\_\_|\_\_|\_\_| at |\_\_|\_\_|\_\_|\_\_|  
D D M M Y Y HOUR MINUTES

### Pro-calcitonin (pro-ct)

Has the blood sample been taken for the pro-ct analysis?

Yes No

If Yes, refer to the Study Procedures Handbook for handling and storage.

If No, please specify why: \_\_\_\_\_

Please fill in as soon as the results are available:

Pro-calcitonin (mcg/L) |\_\_|\_\_|\_\_|\_\_|

### C-reactive protein (CRP), serum amyloid (SAA) and RANTES

Has the blood sample been taken for the CRP, SAA and RANTES analysis?

Yes No

If Yes, refer to the Study Procedures Handbook for handling and storage.

If No, please specify why: \_\_\_\_\_

Please fill in as soon as the results are available:

CRP (mg/L) |\_\_|\_\_|\_\_|\_\_|

SAA (mg/L) |\_\_|\_\_|\_\_|\_\_|

RANTES (mcg/L) |\_\_|\_\_|\_\_|\_\_|

Centre No. |\_\_|\_\_|\_\_|\_\_| Screen. No. |\_\_|\_\_|\_\_|\_\_| Randomisation No. |\_\_|\_\_|\_\_|\_\_| Pat. Init. |\_\_|\_\_|\_\_|\_\_|  
Family name Name

## VISIT 3 – Day 2

Visit date |\_\_|\_\_|\_\_|\_\_|\_\_|\_\_|\_\_|\_\_| at |\_\_|\_\_|\_\_|\_\_|  
D D M M Y Y HOUR MINUTES

### ARTERIAL BLOOD GASES

|                                                   | Yes                      | No                       |
|---------------------------------------------------|--------------------------|--------------------------|
| Arterial blood gas analysis performed:            | <input type="checkbox"/> | <input type="checkbox"/> |
| If YES: patient was under O <sub>2</sub> therapy? | <input type="checkbox"/> | <input type="checkbox"/> |

If patient was under O<sub>2</sub> therapy please indicate:

- how many L/min: |\_\_|,|\_\_|
- how many hours/day: |\_\_|\_\_|

If arterial blood gas analysis was performed, indicate:

pH: |\_\_|,|\_\_|\_\_|

PaO<sub>2</sub>: |\_\_|\_\_|\_\_| mmHg

PaCO<sub>2</sub>: |\_\_|\_\_|\_\_| mmHg

SO<sub>2</sub>: |\_\_|\_\_|\_\_| %

HCO<sub>3</sub><sup>-</sup>: |\_\_|\_\_|\_\_| mmol/L

### COMPLIANCE

|                       | Yes                      | No                       |
|-----------------------|--------------------------|--------------------------|
| Is patient compliant: | <input type="checkbox"/> | <input type="checkbox"/> |

If "No", please specify:

---

---



## VISIT 3 – Day 2

Visit date |\_\_|\_\_|\_\_|\_\_|\_\_|\_\_|\_\_|\_\_| at |\_\_|\_\_|\_\_|\_\_|  
D D M M Y Y HOUR MINUTES

### RANDOMISATION TO BE FILLED ON DAY 2

- Can the subject be randomised?

Yes  No

If Yes, indicate randomisation number: |\_\_|\_\_|\_\_|

- The patient has been randomized to (indicate **ONLY ONE**):

Pro-CT arm

Standard treatment arm

**Remember to send the 3 pro-CT samples (day 0, day 1 and day 2) to the Central Laboratory, University of Padua.**

**Shipping is via courier and takes place on day 2 as soon as the last pro-CT sample has been obtained.**

Refer to the Study Procedures Handbook for instructions on shipment.

### INVESTIGATOR'S STATEMENT

I confirm that the data herein is a true complete and accurate reflection of this subject participation in the study, according to the protocol procedures.

Investigator's name: .....

Investigator's signature: .....

Date: |\_\_|\_\_|\_\_|\_\_|\_\_|\_\_|\_\_|\_\_|  
D D M M Y Y

Centre No. |\_\_|\_\_|\_\_|\_\_| Screen. No. |\_\_|\_\_|\_\_|\_\_| Randomisation No. |\_\_|\_\_|\_\_|\_\_| Pat. Init. |\_\_|\_\_|\_\_|\_\_|  
Family name Name

## VISIT 4 – At discharge and / or at day 10

Visit date |\_\_|\_\_|\_\_|\_\_|\_\_|\_\_|\_\_|\_\_|\_\_|\_\_| at |\_\_|\_\_|\_\_|\_\_|  
D D M M Y Y HOUR MINUTES

Has the patient withdrawn prematurely from the study?

- Yes  
 No

If Yes, please fill in the “Investigator's statement” at the end of visit 4 and the “Study Conclusion Summary/Wihtdrawal/Drop-out Form”.

Has the patient been discharged from the Hospital?

- Yes  
 No

If Yes, please specify the date: |\_\_|\_\_|\_\_|\_\_|\_\_|\_\_|\_\_|\_\_|\_\_|\_\_|  
D D M M Y Y

## ADVERSE EVENTS related to antibiotic treatment

Did any adverse event related to antibiotic treatment occur since the last visit?

- Yes  
 No

If Yes, please complete the appropriate “adverse event” page and report it immediately to the Direzione Sanitaria of the Hospital and to CROM (see Study Procedures Handbook for instructions).

**VISIT 4 – At discharge and / or at day 10**

Visit date | | | | | | | | | | | | | | at | | | | | | | | | | | | | |  
D D M M Y Y HOUR MINUTES

**OCCURRING EVENTS**

**PLEASE COMPLETE THE FOLLOWING TABLE:**

|                                                                                                                                                                                                                |                                                              |                                                                                                                                                                                                                                                         |
|----------------------------------------------------------------------------------------------------------------------------------------------------------------------------------------------------------------|--------------------------------------------------------------|---------------------------------------------------------------------------------------------------------------------------------------------------------------------------------------------------------------------------------------------------------|
| <p>Did the patient require <u>ventilatory support</u> since the last visit?</p> <p><i>*If YES: please add ventilatory support information in the "medication since the last visit" section on page 32.</i></p> | <input type="checkbox"/> Yes*<br><input type="checkbox"/> No | <p>If YES, specify reason(s) for ventilatory support need:<br/>         _____</p> <p>If YES, please indicate date when ventilatory support began since last visit (DD/MM/YY):<br/>                                    </p>                              |
| <p>Was the patient admitted to an Intensive Care Unit <u>for any cause</u> since the last visit?</p>                                                                                                           | <input type="checkbox"/> Yes<br><input type="checkbox"/> No  | <p>If YES, specify reason(s) for admission to ICU:<br/>         _____</p> <p>If YES, please indicate date of admission to ICU since last visit (DD/MM/YY):<br/>                                    </p>                                                 |
| <p>Did the patient have any episode(s) of <u>pulmonary embolism</u> since the last visit?</p>                                                                                                                  | <input type="checkbox"/> Yes<br><input type="checkbox"/> No  | <p>If YES indicate date of onset of pulmonary embolism since last visit (DD/MM/YY):<br/>                                    </p>                                                                                                                        |
| <p>Did the patient have any <u>cardiovascular events, including acute onset pulmonary edema</u> since the last visit?</p>                                                                                      | <input type="checkbox"/> Yes<br><input type="checkbox"/> No  | <p>If YES, specify kind of cardiovascular event(s):<br/>         _____</p> <p>If YES indicate date(s) of onset of new event(s) since last visit (DD/MM/YY):<br/>         1)                            <br/>         2)                            </p> |
| <p>Did the patient have any episodes of <u>pneumonia</u> since the last visit?</p>                                                                                                                             | <input type="checkbox"/> Yes<br><input type="checkbox"/> No  | <p>If YES indicate date of onset of pneumonia since last visit (DD/MM/YY):<br/>                                    </p>                                                                                                                                 |
| <p>Did the patient have <u>any other significant occurring event</u> since the last visit?</p>                                                                                                                 | <input type="checkbox"/> Yes<br><input type="checkbox"/> No  | <p>If YES, specify event(s):<br/>         _____</p> <p>If YES indicate date(s) of onset of new event(s) since last visit (DD/MM/YY):<br/>         1)                            <br/>         2)                            </p>                        |

**Has the patient experienced at least one of the above events since the last visit (i.e. did you answer YES to any of the above questions)?**

No  Yes\*

\* If YES please fax a copy of this page to CROM as indicated in the Study Procedures Handbook.

Centre No. | | | | Screen. No. | | | | Randomisation No. | | | | Pat. Init. | | | |  
Family name Name

**VISIT 4 – At discharge and / or at day 10**

Visit date | | | | | | | | at | | | | | | | |  
D D M M Y Y HOUR MINUTES

**MEDICATION SINCE THE LAST VISIT**

Has any medication been instituted, stopped and/or modified (dose change) since the last visit?\*

No       Yes\*\*

\* please remember to include information on any change to antibiotic treatment

\*\* If YES please complete the following details, including only medications instituted, stopped and/or modified (dose change) since the last visit.

| Trade name | Indication | Posology |      | Route | Administration (DD/MM/YY) |                       |
|------------|------------|----------|------|-------|---------------------------|-----------------------|
|            |            | Dose/day | Unit |       | Start date                | End date (or ONGOING) |
|            |            |          |      |       |                           |                       |
|            |            |          |      |       |                           |                       |
|            |            |          |      |       |                           |                       |
|            |            |          |      |       |                           |                       |
|            |            |          |      |       |                           |                       |

**MEDICATION AT HOSPITAL DISCHARGE**

*When the patient is discharged: please record in the following table all medication prescribed to the patient at the time of hospital discharge, including therapy for stable COPD and any other therapy the patient will take after leaving the hospital*

| Trade name | Indication | Posology |      | Route | Administration (DD/MM/YY) |                       |
|------------|------------|----------|------|-------|---------------------------|-----------------------|
|            |            | Dose/day | Unit |       | Start date                | End date (or ONGOING) |
|            |            |          |      |       |                           |                       |
|            |            |          |      |       |                           |                       |
|            |            |          |      |       |                           |                       |
|            |            |          |      |       |                           |                       |
|            |            |          |      |       |                           |                       |
|            |            |          |      |       |                           |                       |

Centre No. | | | | | Screen. No. | | | | | Randomisation No. | | | | | Pat. Init. | | | | |  
Family name Name

### VISIT 4 – At discharge and / or at day 10

Visit date | | | | | at | | | | |  
D D M M Y Y HOUR MINUTES

### PHYSICAL EXAMINATION

| Physical examination                | Status                                                                                                    | Comments: if "abnormal" specify: |
|-------------------------------------|-----------------------------------------------------------------------------------------------------------|----------------------------------|
| Cardiovascular system               | <input type="checkbox"/> Abnormal<br><input type="checkbox"/> Normal<br><input type="checkbox"/> Not done |                                  |
| Respiratory system<br>(except COPD) | <input type="checkbox"/> Abnormal<br><input type="checkbox"/> Normal<br><input type="checkbox"/> Not done |                                  |
| Lymphatic system                    | <input type="checkbox"/> Abnormal<br><input type="checkbox"/> Normal<br><input type="checkbox"/> Not done |                                  |
| Neurological-locomotor system       | <input type="checkbox"/> Abnormal<br><input type="checkbox"/> Normal<br><input type="checkbox"/> Not done |                                  |
| Skin                                | <input type="checkbox"/> Abnormal<br><input type="checkbox"/> Normal<br><input type="checkbox"/> Not done |                                  |
| Endocrine                           | <input type="checkbox"/> Abnormal<br><input type="checkbox"/> Normal<br><input type="checkbox"/> Not done |                                  |
| Ear-nose-throat system              | <input type="checkbox"/> Abnormal<br><input type="checkbox"/> Normal<br><input type="checkbox"/> Not done |                                  |
| Ophthalmological system             | <input type="checkbox"/> Abnormal<br><input type="checkbox"/> Normal<br><input type="checkbox"/> Not done |                                  |
| Gastrointestinal system             | <input type="checkbox"/> Abnormal<br><input type="checkbox"/> Normal<br><input type="checkbox"/> Not done |                                  |
| Others<br>.....                     | <input type="checkbox"/> Abnormal<br><input type="checkbox"/> Normal<br><input type="checkbox"/> Not done |                                  |

### VITAL SIGNS

Body temperature | | | | |

| SITTING BLOOD PRESSURE<br>(mmHg) |           | SITTING HEART RATE<br>(bpm) |
|----------------------------------|-----------|-----------------------------|
| Systolic                         | Diastolic |                             |
|                                  |           |                             |

Centre No. | | | | | Screen. No. | | | | | Randomisation No. | | | | | Pat. Init. | | | | |  
Family name Name

### VISIT 4 – At discharge and / or at day 10

Visit date | | | | | | | | | | | | | | | at | | | | | | | | | | | | | | |  
D D M M Y Y HOUR MINUTES

### LABORATORY TESTS

Collect blood sample for haematology and blood chemistry  
 (LOCAL LABORATORY)

| Haematology tests *            |                 | Clinically Significant ** |    |
|--------------------------------|-----------------|---------------------------|----|
|                                |                 | Yes                       | No |
| Haemoglobin (mmol/L)           | .               |                           |    |
| Haematocrit (L/L)              | .               |                           |    |
| RBC (10 <sup>12</sup> /L)      | .               |                           |    |
| WBC (10 <sup>9</sup> /L)       | .               |                           |    |
| WBC (differential counts)      | Neutrophils (%) | .                         |    |
|                                | Eosinophils (%) | .                         |    |
|                                | Basophils (%)   | .                         |    |
|                                | Monocytes (%)   | .                         |    |
|                                | Lymphocytes (%) | .                         |    |
| Platelet (10 <sup>9</sup> /L)  |                 |                           |    |
| <b>Blood Chemistry tests *</b> |                 |                           |    |
| Alkaline Phosphatase (U/L)     | .               |                           |    |
| AST (SGOT) (U/L)               | .               |                           |    |
| ALT (SGPT) (U/L)               | .               |                           |    |
| BUN/blood urea (mmol/L)        | .               |                           |    |
| Creatinine Kinase (U/L)        | .               |                           |    |
| Creatinine (µmol/L)            | .               |                           |    |
| Gamma-GT (U/L)                 | .               |                           |    |
| Sodium (mmol/L)                | .               |                           |    |
| Potassium (mmol/L)             | .               |                           |    |
| Glucose (mmol/L)               | .               |                           |    |

\* to be filled in as soon as results are available

\*\* For the out of range values, please specify if the abnormality is clinically or not clinically significant

**Laboratory results need to be stored in the patient's file**

**VISIT 4 – At discharge and / or at day 10**

Visit date |\_\_|\_\_|\_\_|\_\_|\_\_|\_\_|\_\_|\_\_|\_\_|\_\_| at |\_\_|\_\_|\_\_|\_\_|\_\_|\_\_|  
D D M M Y Y HOUR MINUTES

**Pro-calcitonin (pro-ct)**

Has the blood sample been taken for the pro-ct analysis?

Yes No

If Yes, refer to the Study Procedures Handbook for handling and storage.

If No, please specify why: \_\_\_\_\_

Please fill in as soon as the results are available:

Pro-calcitonin (mcg/L) |\_\_|\_\_|\_\_|\_\_|

**C-reactive protein (CRP), serum amyloid (SAA) and RANTES**

Has the blood sample been taken for the CRP, SAA and RANTES analysis?

Yes No

If Yes, refer to the Study Procedures Handbook for handling and storage.

If No, please specify why: \_\_\_\_\_

Please fill in as soon as the results are available:

CRP (mg/L) |\_\_|\_\_|\_\_|\_\_|

SAA (mg/L) |\_\_|\_\_|\_\_|\_\_|

RANTES (mcg/L) |\_\_|\_\_|\_\_|\_\_|

**PTX-3 and IL1 decoy**

Has the blood sample been taken for the PTX-3 and IL1 decoy analysis?

Yes No

If Yes, refer to the Study Procedures Handbook for handling and storage.

If No, please specify why: \_\_\_\_\_

Please fill in as soon as the results are available:

PTX-3 (ng/ml) |\_\_|\_\_|\_\_|\_\_|

IL1 decoy (ng/ml) |\_\_|\_\_|\_\_|\_\_|

Centre No. |\_\_|\_\_|\_\_|\_\_| Screen. No. |\_\_|\_\_|\_\_|\_\_| Randomisation No. |\_\_|\_\_|\_\_|\_\_| Pat. Init. |\_\_|\_\_|\_\_|\_\_|  
Family name Name

### VISIT 4 – At discharge and / or at day 10

Visit date |\_\_|\_\_|\_\_|\_\_|\_\_|\_\_|\_\_|\_\_|\_\_|\_\_| at |\_\_|\_\_|\_\_|\_\_|\_\_|\_\_|  
D D M M Y Y HOUR MINUTES

### QUESTIONNAIRES FOR RESPIRATORY SYMPTOMS/QUALITY OF LIFE

SF36 score: total |\_\_|\_\_|\_\_|\_\_|  
 BDI score: total |\_\_|\_\_|\_\_|\_\_|  
 TDI score: total |\_\_|\_\_|\_\_|\_\_|  
 CCIQ Score: total |\_\_|\_\_|\_\_|\_\_|

### PHARMACOECONOMIC QUESTIONNAIRE

Please remind to fill in the pharmacoeconomic questionnaire and enclose it in the plastic envelope.

### SPIROMETRY

- SPIROMETRY:** from 3 acceptable spirometric manoeuvres record the highest FEV<sub>1</sub> and FVC, irrespective of the manoeuvre (curve) they come from.

date |\_\_|\_\_|\_\_|\_\_|\_\_|\_\_|\_\_|\_\_|\_\_|\_\_| at |\_\_|\_\_|\_\_|\_\_|\_\_|\_\_|  
HOUR MINUTES

|                                                   |                                          |
|---------------------------------------------------|------------------------------------------|
| <b>FVC</b>                                        | __ ,  __ __ __ __  litre                 |
| <b>FEV<sub>1</sub></b>                            | __ ,  __ __ __ __  litre                 |
| <b>FEV<sub>1</sub> predicted normal value</b>     | __ ,  __ __ __ __  litre [ERS standards] |
| <b>FEV<sub>1</sub> (% predicted normal value)</b> | __ __  % of predicted value              |
| <b>FEV<sub>1</sub>/FVC (%)</b>                    | __ __ __ ,  __  %                        |



**VISIT 4 – At discharge and / or at day 10**

Visit date |\_\_|\_\_|\_\_|\_\_|\_\_|\_\_|\_\_|\_\_|\_\_|\_\_| at |\_\_|\_\_|\_\_|\_\_|\_\_|\_\_|  
D D M M Y Y HOUR MINUTES

**MICROBIOLOGY**

Yes No

Sputum collection performed:

If YES, specify volume of sputum collected: |\_\_|,|\_\_| ml

If NO, specify why \_\_\_\_\_

Results from local laboratory:

**Bacteriology:**

Identified microorganism #1: \_\_\_\_\_ CFU/ml: |\_\_|\_\_|\_\_|\_\_|

Identified microorganism #2: \_\_\_\_\_ CFU/ml: |\_\_|\_\_|\_\_|\_\_|

Identified microorganism #3: \_\_\_\_\_ CFU/ml: |\_\_|\_\_|\_\_|\_\_|

**Serology for Intracellular pathogens:**

Has the sample for serology for intracellular pathogens been obtained? Yes  No

**If Yes, please complete below:**

Was serology positive for **Mycoplasma pneumoniae**? Yes  No

If YES, indicate: IgM: |\_\_|\_\_|\_\_|,|\_\_|\_\_|\_\_|

IgG: |\_\_|\_\_|\_\_|,|\_\_|\_\_|\_\_|

Was serology positive for **Chlamydia**? Yes  No

If YES, indicate: IgM: |\_\_|\_\_|\_\_|,|\_\_|\_\_|\_\_|

IgG: |\_\_|\_\_|\_\_|,|\_\_|\_\_|\_\_|

Was serology positive for **Legionella pneumophila**? Yes  No

If YES, indicate:

**POSITIVE                      NEGATIVE**

Legionella pneumophila IgM

Legionella pneumophila IgG

Centre No. |\_\_|\_\_|\_\_|\_\_| Screen. No. |\_\_|\_\_|\_\_|\_\_| Randomisation No. |\_\_|\_\_|\_\_|\_\_| Pat. Init. |\_\_|\_\_|\_\_|\_\_|  
Family name Name

## VISIT 4 – At discharge and / or at day 10

Visit date |\_\_|\_\_|\_\_|\_\_|\_\_|\_\_|\_\_|\_\_|\_\_|\_\_| at |\_\_|\_\_|\_\_|\_\_|\_\_|\_\_|  
D D M M Y Y HOUR MINUTES

### MICROBIOLOGY (continued)

Has the sample for **respiratory viruses RT-PCR analysis** been collected and stored at  $-80^{\circ}\text{C}$ ?

Yes  No

If **YES**, specify volume stored at  $-80^{\circ}\text{C}$  for RT-PCR: |\_\_|,|\_\_|\_\_|\_\_| ml

*Please remember to label the sample with the patient's ID number and store it at  $-80^{\circ}\text{C}$ , as described in the Study Procedures Handbook.*

Has the sample for **inflammatory cell counts** been collected? Yes  No

Were the slides prepared and stored at  $-20^{\circ}\text{C}$ ? Yes  No

If YES: how many slides were prepared? |\_\_|\_\_|

**VISIT 4 – At discharge and / or at day 10**

Visit date |\_\_|\_\_|\_\_|\_\_|\_\_|\_\_|\_\_|\_\_|\_\_|\_\_| at |\_\_|\_\_|\_\_|\_\_|  
D D M M Y Y HOUR MINUTES

**ARTERIAL BLOOD GASES**

|                                                              | Yes                      | No                       |
|--------------------------------------------------------------|--------------------------|--------------------------|
| Arterial blood gas analysis performed:                       | <input type="checkbox"/> | <input type="checkbox"/> |
| If <b>YES</b> : patient was under O <sub>2</sub> therapy?    | <input type="checkbox"/> | <input type="checkbox"/> |
| If patient was under O <sub>2</sub> therapy please indicate: |                          |                          |
| - how many L/min:  __ , __                                   |                          |                          |
| - how many hours/day:  __ __                                 |                          |                          |

If arterial blood gas analysis was performed, indicate:

pH: |\_\_|,|\_\_|\_\_|  
 PaO<sub>2</sub>: |\_\_|\_\_|\_\_| mmHg  
 PaCO<sub>2</sub>: |\_\_|\_\_|\_\_| mmHg  
 SO<sub>2</sub>: |\_\_|\_\_|\_\_| %  
 HCO<sub>3</sub><sup>-</sup>: |\_\_|\_\_|\_\_| mmol/L

**COMPLIANCE**

|                       | Yes                      | No                       |
|-----------------------|--------------------------|--------------------------|
| Is patient compliant: | <input type="checkbox"/> | <input type="checkbox"/> |

If "No", please specify:

---



---

**INVESTIGATOR'S STATEMENT**

I confirm that the data herein is a true complete and accurate reflection of this subject participation in the study, according to the protocol procedures.

Investigator's name: .....

Investigator's signature: .....

Date: |\_\_|\_\_|\_\_|\_\_|\_\_|\_\_|\_\_|\_\_|\_\_|\_\_|  
D D M M Y Y

Centre No. | | | | | Screen. No. | | | | | Randomisation No. | | | | | Pat. Init. | | | | |  
Family name Name

## VISIT 5 – Day 30

Visit date | | | | | | | | | | | | | | | at | | | | | | | | | | |  
D D M M Y Y HOUR MINUTES

Has the patient withdrawn prematurely from the study?

- Yes  
 No

If Yes, please fill in the “Investigator’s statement” at the end of visit 5 and the “Study Conclusion Summary/Wihtdrawal/Drop-out Form”.

Has the patient been discharged from the Hospital?\*

- Yes  
 No

If Yes, please specify the date: | | | | | | | | | | | | | | |  
D D M M Y Y

\* please complete only if patient had not been discharged by Visit 4

**VISIT 5 – Day 30**

Visit date | | | | | | | | | | | | | | | at | | | | | | | | | | | | | | |  
D D M M Y Y HOUR MINUTES

**OCCURRING EVENTS**

**PLEASE COMPLETE THE FOLLOWING TABLE:**

|                                                                                                                                                                                                                                                                                                                                                                                                                                                                      |                                                             |                                                                                                                                                                                                                                                                                                                                                                                                                                |
|----------------------------------------------------------------------------------------------------------------------------------------------------------------------------------------------------------------------------------------------------------------------------------------------------------------------------------------------------------------------------------------------------------------------------------------------------------------------|-------------------------------------------------------------|--------------------------------------------------------------------------------------------------------------------------------------------------------------------------------------------------------------------------------------------------------------------------------------------------------------------------------------------------------------------------------------------------------------------------------|
| <p>Did the patient have at least one COPD exacerbation* since the last visit?<br/>                 (*defined as:</p> <ul style="list-style-type: none"> <li>- worsening of respiratory symptoms requiring treatment with antibiotics and/or systemic steroids since last visit</li> <li>- and/or new hospital admission for a COPD exacerbation since last visit</li> <li>- and/or need for ventilatory support or intubation, or death since last visit)</li> </ul> | <input type="checkbox"/> Yes<br><input type="checkbox"/> No | <p>If YES indicate date(s) of onset of new COPD exacerbation(s) since last visit (DD/MM/YY):</p> <p>1)                              </p> <p>2)                              </p> <p>3)                              </p>                                                                                                                                                                                                       |
| <p>Was the patient hospitalized <u>for a new COPD exacerbation</u> since the last visit?</p>                                                                                                                                                                                                                                                                                                                                                                         | <input type="checkbox"/> Yes<br><input type="checkbox"/> No | <p>If YES indicate date(s) of new hospitalization(s) for COPD exacerbation(s) since last visit (from DD/MM/YY to DD/MM/YY):</p> <p>1) from                               to                              </p> <p>2) from                               to                              </p> <p>3) from                               to                              </p>                                                      |
| <p>Was the patient hospitalized <u>for any other cause</u> (except COPD) since the last visit?</p>                                                                                                                                                                                                                                                                                                                                                                   | <input type="checkbox"/> Yes<br><input type="checkbox"/> No | <p>If YES, specify reason(s) for hospitalization(s):</p> <p>_____</p> <p>If YES, please indicate date(s) of new hospitalization(s) since last visit (from DD/MM/YY to DD/MM/YY):</p> <p>1) from                               to                              </p> <p>2) from                               to                              </p> <p>3) from                               to                              </p> |
| <p>Was the patient admitted to an Intensive Care Unit <u>for any cause</u> since the last visit?</p>                                                                                                                                                                                                                                                                                                                                                                 | <input type="checkbox"/> Yes<br><input type="checkbox"/> No | <p>If YES, specify reason(s) for admission(s) to ICU:</p> <p>_____</p> <p>If YES, please indicate date(s) of admission(s) to ICU since last visit (from DD/MM/YY to DD/MM/YY):</p> <p>1) from                               to                              </p> <p>2) from                               to                              </p> <p>3) from                               to                              </p>   |

**VISIT 5 – Day 30**

Visit date | | | | | | | | | | | | | | | at | | | | | | | | | | | | | | |  
D D M M Y Y HOUR MINUTES

**OCCURRING EVENTS (continued)**

|                                                                                                                           |                                                                     |                                                                                                                                                                                                                                                                                                                             |
|---------------------------------------------------------------------------------------------------------------------------|---------------------------------------------------------------------|-----------------------------------------------------------------------------------------------------------------------------------------------------------------------------------------------------------------------------------------------------------------------------------------------------------------------------|
| <p>Did the patient have any episode(s) of <u>pulmonary embolism</u> since the last visit?</p>                             | <p><input type="checkbox"/> Yes<br/><input type="checkbox"/> No</p> | <p>If YES indicate date(s) of onset of episode(s) of pulmonary embolism since last visit (DD/MM/YY):</p> <p>1)                              <br/>                 2)                              <br/>                 3)                              </p>                                                                |
| <p>Did the patient have any <u>cardiovascular events, including acute onset pulmonary edema</u> since the last visit?</p> | <p><input type="checkbox"/> Yes<br/><input type="checkbox"/> No</p> | <p>If YES, specify kind of cardiovascular event(s):<br/>                 _____</p> <p>If YES indicate date(s) of onset of new event(s) since last visit (DD/MM/YY):</p> <p>1)                              <br/>                 2)                              <br/>                 3)                              </p> |
| <p>Did the patient have any episodes of <u>pneumonia</u> since the last visit?</p>                                        | <p><input type="checkbox"/> Yes<br/><input type="checkbox"/> No</p> | <p>If YES indicate date(s) of onset of pneumonia since last visit (DD/MM/YY):</p> <p>1)                              <br/>                 2)                              <br/>                 3)                              </p>                                                                                       |
| <p>Did the patient have any <u>other significant occurring event</u> since the last visit?</p>                            | <p><input type="checkbox"/> Yes<br/><input type="checkbox"/> No</p> | <p>If YES, specify event(s):<br/>                 _____</p> <p>If YES indicate date(s) of onset of new event(s) since last visit (DD/MM/YY):</p> <p>1)                              <br/>                 2)                              <br/>                 3)                              </p>                        |

Has the patient experienced at least one of the above events since the last visit (i.e. did you answer YES to any of the above questions)?

No  Yes\*

\* If YES please fax a copy of pages 41-42 to CROM as indicated in the Study Procedures Handbook.

Centre No. | | | | Screen. No. | | | | Randomisation No. | | | | Pat. Init. | | | |  
Family name Name

**VISIT 5 – Day 30**

Visit date | | | | | | | | | | | | | | at | | | | | | | | | |  
D D M M Y Y HOUR MINUTES

**MEDICATION SINCE THE LAST VISIT**

Has any medication been instituted, stopped and/or modified (dose change) since the last visit?  No  Yes

*If YES please complete the following details, including only medications instituted, stopped and/or modified (dose change) since the last visit.*

| Trade name | Indication | Posology |      | Route | Administration (DD/MM/YY) |                       |
|------------|------------|----------|------|-------|---------------------------|-----------------------|
|            |            | Dose/day | Unit |       | Start date                | End date (or ONGOING) |
|            |            |          |      |       |                           |                       |
|            |            |          |      |       |                           |                       |
|            |            |          |      |       |                           |                       |
|            |            |          |      |       |                           |                       |
|            |            |          |      |       |                           |                       |
|            |            |          |      |       |                           |                       |
|            |            |          |      |       |                           |                       |
|            |            |          |      |       |                           |                       |
|            |            |          |      |       |                           |                       |
|            |            |          |      |       |                           |                       |

Centre No. | | | | | Screen. No. | | | | | Randomisation No. | | | | | Pat. Init. | | | | |  
Family name Name

### VISIT 5 – Day 30

Visit date | | | | | at | | | | |  
D D M M Y Y HOUR MINUTES

### PHYSICAL EXAMINATION

| Physical examination                | Status                                                                                                    | Comments: if "abnormal" specify: |
|-------------------------------------|-----------------------------------------------------------------------------------------------------------|----------------------------------|
| Cardiovascular system               | <input type="checkbox"/> Abnormal<br><input type="checkbox"/> Normal<br><input type="checkbox"/> Not done |                                  |
| Respiratory system<br>(except COPD) | <input type="checkbox"/> Abnormal<br><input type="checkbox"/> Normal<br><input type="checkbox"/> Not done |                                  |
| Lymphatic system                    | <input type="checkbox"/> Abnormal<br><input type="checkbox"/> Normal<br><input type="checkbox"/> Not done |                                  |
| Neurological-locomotor system       | <input type="checkbox"/> Abnormal<br><input type="checkbox"/> Normal<br><input type="checkbox"/> Not done |                                  |
| Skin                                | <input type="checkbox"/> Abnormal<br><input type="checkbox"/> Normal<br><input type="checkbox"/> Not done |                                  |
| Endocrine                           | <input type="checkbox"/> Abnormal<br><input type="checkbox"/> Normal<br><input type="checkbox"/> Not done |                                  |
| Ear-nose-throat system              | <input type="checkbox"/> Abnormal<br><input type="checkbox"/> Normal<br><input type="checkbox"/> Not done |                                  |
| Ophthalmological system             | <input type="checkbox"/> Abnormal<br><input type="checkbox"/> Normal<br><input type="checkbox"/> Not done |                                  |
| Gastrointestinal system             | <input type="checkbox"/> Abnormal<br><input type="checkbox"/> Normal<br><input type="checkbox"/> Not done |                                  |
| Others<br>.....                     | <input type="checkbox"/> Abnormal<br><input type="checkbox"/> Normal<br><input type="checkbox"/> Not done |                                  |

### VITAL SIGNS

| SITTING BLOOD PRESSURE<br>(mmHg) |           | SITTING HEART RATE<br>(bpm) |
|----------------------------------|-----------|-----------------------------|
| Systolic                         | Diastolic |                             |
|                                  |           |                             |





Centre No. |\_\_|\_\_|\_\_|\_\_| Screen. No. |\_\_|\_\_|\_\_|\_\_| Randomisation No. |\_\_|\_\_|\_\_|\_\_| Pat. Init. |\_\_|\_\_|\_\_|\_\_|  
Family name Name

## VISIT 5 – Day 30

Visit date |\_\_|\_\_|\_\_|\_\_|\_\_|\_\_|\_\_|\_\_| at |\_\_|\_\_|\_\_|\_\_|  
D D M M Y Y HOUR MINUTES

### QUESTIONNAIRES FOR RESPIRATORY SYMPTOMS/QUALITY OF LIFE

SF36 score: total |\_\_|\_\_|\_\_|\_\_|  
 BDI score: total |\_\_|\_\_|\_\_|\_\_|  
 TDI score: total |\_\_|\_\_|\_\_|\_\_|  
 CCIQ Score: total |\_\_|\_\_|\_\_|\_\_|

### PHARMACOECONOMIC QUESTIONNAIRE

Please remind to fill in the pharmacoeconomic questionnaire and enclose it in the plastic envelope.

### SPIROMETRY

- SPIROMETRY:** from 3 acceptable spirometric manoeuvres record the highest FEV<sub>1</sub> and FVC, irrespective of the manoeuvre (curve) they come from.

date |\_\_|\_\_|\_\_|\_\_|\_\_|\_\_| at |\_\_|\_\_|\_\_|\_\_|  
HOUR MINUTES

|                                                   |                                          |
|---------------------------------------------------|------------------------------------------|
| <b>FVC</b>                                        | __ ,  __ __ __ __  litre                 |
| <b>FEV<sub>1</sub></b>                            | __ ,  __ __ __ __  litre                 |
| <b>FEV<sub>1</sub> predicted normal value</b>     | __ ,  __ __ __ __  litre [ERS standards] |
| <b>FEV<sub>1</sub> (% predicted normal value)</b> | __ __  % of predicted value              |
| <b>FEV<sub>1</sub>/FVC (%)</b>                    | __ __ __ ,  __  %                        |

**VISIT 5 – Day 30**

Visit date |\_\_|\_\_|\_\_|\_\_|\_\_|\_\_|\_\_|\_\_|\_\_|\_\_| at |\_\_|\_\_|\_\_|\_\_|\_\_|\_\_|  
D D M M Y Y HOUR MINUTES

**MICROBIOLOGY**

Yes No

Sputum collection performed:

If YES, specify volume of sputum collected: |\_\_|,|\_\_| ml

If NO, specify why \_\_\_\_\_

Results from local laboratory:

**Bacteriology:**

Identified microorganism #1: \_\_\_\_\_ CFU/ml: |\_\_|\_\_|\_\_|\_\_|

Identified microorganism #2: \_\_\_\_\_ CFU/ml: |\_\_|\_\_|\_\_|\_\_|

Identified microorganism #3: \_\_\_\_\_ CFU/ml: |\_\_|\_\_|\_\_|\_\_|

**Serology for Intracellular pathogens:**

Has the sample for serology for intracellular pathogens been obtained? Yes  No

**If Yes, please complete below:**

Was serology positive for **Mycoplasma pneumoniae**? Yes  No

If YES, indicate: IgM: |\_\_|\_\_|\_\_|,|\_\_|\_\_|\_\_|

IgG: |\_\_|\_\_|\_\_|,|\_\_|\_\_|\_\_|

Was serology positive for **Chlamydia**? Yes  No

If YES, indicate: IgM: |\_\_|\_\_|\_\_|,|\_\_|\_\_|\_\_|

IgG: |\_\_|\_\_|\_\_|,|\_\_|\_\_|\_\_|

Was serology positive for **Legionella pneumophila**? Yes  No

If YES, indicate:

**POSITIVE                      NEGATIVE**

Legionella pneumophila IgM

Legionella pneumophila IgG

Centre No. |\_\_|\_\_|\_\_|\_\_| Screen. No. |\_\_|\_\_|\_\_|\_\_| Randomisation No. |\_\_|\_\_|\_\_|\_\_| Pat. Init. |\_\_|\_\_|\_\_|\_\_|  
Family name Name

## VISIT 5 – Day 30

Visit date |\_\_|\_\_|\_\_|\_\_|\_\_|\_\_|\_\_|\_\_| at |\_\_|\_\_|\_\_|\_\_|  
D D M M Y Y HOUR MINUTES

### MICROBIOLOGY (continued)

Has the sample for **respiratory viruses RT-PCR analysis** been collected and stored at  $-80^{\circ}\text{C}$ ?

Yes  No

If **YES**, specify volume stored at  $-80^{\circ}\text{C}$  for RT-PCR: |\_\_|,|\_\_|\_\_|\_\_| ml

*Please remember to label the sample with the patient's ID number and store it at  $-80^{\circ}\text{C}$ , as described in the Study Procedures Handbook.*

Has the sample for **inflammatory cell counts** been collected? Yes  No

Were the slides prepared and stored at  $-20^{\circ}\text{C}$ ? Yes  No

If YES: how many slides were prepared? |\_\_|\_\_|

### VISIT 5 – Day 30

Visit date |\_\_|\_\_|\_\_|\_\_|\_\_|\_\_|\_\_|\_\_|\_\_|\_\_| at |\_\_|\_\_|\_\_|\_\_|\_\_|\_\_|  
D D M M Y Y HOUR MINUTES

### ARTERIAL BLOOD GASES

|                                                                    | Yes                      | No                       |
|--------------------------------------------------------------------|--------------------------|--------------------------|
| Arterial blood gas analysis performed:                             | <input type="checkbox"/> | <input type="checkbox"/> |
| <b>If YES:</b> patient was under O <sub>2</sub> therapy?           | <input type="checkbox"/> | <input type="checkbox"/> |
| <b>If patient was under O<sub>2</sub> therapy</b> please indicate: |                          |                          |
| - how many L/min:  __ , __                                         |                          |                          |
| - how many hours/day:  __ __                                       |                          |                          |

If arterial blood gas analysis was performed, indicate:

pH: |\_\_|,|\_\_|\_\_|

PaO<sub>2</sub>: |\_\_|\_\_|\_\_| mmHg

PaCO<sub>2</sub>: |\_\_|\_\_|\_\_| mmHg

SO<sub>2</sub>: |\_\_|\_\_|\_\_| %

HCO<sub>3</sub><sup>-</sup>: |\_\_|\_\_|\_\_| mmol/L

### INVESTIGATOR'S STATEMENT

I confirm that the data herein is a true complete and accurate reflection of this subject participation in the study, according to the protocol procedures.

Investigator's name: .....

Investigator's signature: .....

Date: |\_\_|\_\_|\_\_|\_\_|\_\_|\_\_|\_\_|\_\_|\_\_|\_\_|  
D D M M Y Y

Centre No. | | | | | Screen. No. | | | | | Randomisation No. | | | | | Pat. Init. | | | | |  
Family name Name

## TELEPHONE CONTACT – Day 60

Visit date | | | | | at | | | | |  
D D M M Y Y HOUR MINUTES

### CLINICAL STATUS

| Collect information on              | Status                                                                                                    | Comments: if "abnormal" specify: |
|-------------------------------------|-----------------------------------------------------------------------------------------------------------|----------------------------------|
| 1. Cardiovascular system            | <input type="checkbox"/> Abnormal<br><input type="checkbox"/> Normal<br><input type="checkbox"/> Not done |                                  |
| 2. Respiratory system (except COPD) | <input type="checkbox"/> Abnormal<br><input type="checkbox"/> Normal<br><input type="checkbox"/> Not done |                                  |
| 3. Lymphatic system                 | <input type="checkbox"/> Abnormal<br><input type="checkbox"/> Normal<br><input type="checkbox"/> Not done |                                  |
| 4. Neurological-locomotor system    | <input type="checkbox"/> Abnormal<br><input type="checkbox"/> Normal<br><input type="checkbox"/> Not done |                                  |
| 5. Skin                             | <input type="checkbox"/> Abnormal<br><input type="checkbox"/> Normal<br><input type="checkbox"/> Not done |                                  |
| 6. Endocrine                        | <input type="checkbox"/> Abnormal<br><input type="checkbox"/> Normal<br><input type="checkbox"/> Not done |                                  |
| 7. Ear-nose-throat system           | <input type="checkbox"/> Abnormal<br><input type="checkbox"/> Normal<br><input type="checkbox"/> Not done |                                  |
| 8. Ophthalmological system          | <input type="checkbox"/> Abnormal<br><input type="checkbox"/> Normal<br><input type="checkbox"/> Not done |                                  |
| 9. Gastrointestinal system          | <input type="checkbox"/> Abnormal<br><input type="checkbox"/> Normal<br><input type="checkbox"/> Not done |                                  |
| 10. Others<br>.....                 | <input type="checkbox"/> Abnormal<br><input type="checkbox"/> Normal<br><input type="checkbox"/> Not done |                                  |

## TELEPHONE CONTACT – Day 60

Visit date | | | | | | | | | | | | | | | at | | | | | | | | | | | | | | |  
D D M M Y Y HOUR MINUTES

### OCCURRING EVENTS

PLEASE COMPLETE THE FOLLOWING TABLE:

|                                                                                                                                                                                                                                                                                                                                                                                                                                                                      |                                                             |                                                                                                                                                                                                                                                                                                                                                                                                                                |
|----------------------------------------------------------------------------------------------------------------------------------------------------------------------------------------------------------------------------------------------------------------------------------------------------------------------------------------------------------------------------------------------------------------------------------------------------------------------|-------------------------------------------------------------|--------------------------------------------------------------------------------------------------------------------------------------------------------------------------------------------------------------------------------------------------------------------------------------------------------------------------------------------------------------------------------------------------------------------------------|
| <p>Did the patient have at least one COPD exacerbation* since the last visit?<br/>                 (*defined as:</p> <ul style="list-style-type: none"> <li>- worsening of respiratory symptoms requiring treatment with antibiotics and/or systemic steroids since last visit</li> <li>- and/or new hospital admission for a COPD exacerbation since last visit</li> <li>- and/or need for ventilatory support or intubation, or death since last visit)</li> </ul> | <input type="checkbox"/> Yes<br><input type="checkbox"/> No | <p>If YES indicate date(s) of onset of new COPD exacerbation(s) since last visit (DD/MM/YY):</p> <p>1)                              </p> <p>2)                              </p> <p>3)                              </p>                                                                                                                                                                                                       |
| <p>Was the patient hospitalized <u>for a new COPD exacerbation</u> since the last visit?</p>                                                                                                                                                                                                                                                                                                                                                                         | <input type="checkbox"/> Yes<br><input type="checkbox"/> No | <p>If YES indicate date(s) of new hospitalization(s) for COPD exacerbation(s) since last visit (from DD/MM/YY to DD/MM/YY):</p> <p>1) from                               to                              </p> <p>2) from                               to                              </p> <p>3) from                               to                              </p>                                                      |
| <p>Was the patient hospitalized <u>for any other cause</u> (except COPD) since the last visit?</p>                                                                                                                                                                                                                                                                                                                                                                   | <input type="checkbox"/> Yes<br><input type="checkbox"/> No | <p>If YES, specify reason(s) for hospitalization(s):</p> <p>_____</p> <p>If YES, please indicate date(s) of new hospitalization(s) since last visit (from DD/MM/YY to DD/MM/YY):</p> <p>1) from                               to                              </p> <p>2) from                               to                              </p> <p>3) from                               to                              </p> |
| <p>Was the patient admitted to an Intensive Care Unit <u>for any cause</u> since the last visit?</p>                                                                                                                                                                                                                                                                                                                                                                 | <input type="checkbox"/> Yes<br><input type="checkbox"/> No | <p>If YES, specify reason(s) for admission(s) to ICU:</p> <p>_____</p> <p>If YES, please indicate date(s) of admission(s) to ICU since last visit (from DD/MM/YY to DD/MM/YY):</p> <p>1) from                               to                              </p> <p>2) from                               to                              </p> <p>3) from                               to                              </p>   |

**TELEPHONE CONTACT – Day 60**

Visit date | | | | | | | | | | | | | | | at | | | | | | | | | | | | | | |  
D D M M Y Y HOUR MINUTES

**OCCURRING EVENTS (continued)**

|                                                                                                                           |                                                             |                                                                                                                                                                                                                                                                                   |
|---------------------------------------------------------------------------------------------------------------------------|-------------------------------------------------------------|-----------------------------------------------------------------------------------------------------------------------------------------------------------------------------------------------------------------------------------------------------------------------------------|
| <p>Did the patient have any episode(s) of <u>pulmonary embolism</u> since the last visit?</p>                             | <input type="checkbox"/> Yes<br><input type="checkbox"/> No | <p>If YES indicate date(s) of onset of episode(s) of pulmonary embolism since last visit (DD/MM/YY):</p> <p>1)                              </p> <p>2)                              </p> <p>3)                              </p>                                                  |
| <p>Did the patient have any <u>cardiovascular events, including acute onset pulmonary edema</u> since the last visit?</p> | <input type="checkbox"/> Yes<br><input type="checkbox"/> No | <p>If YES, specify kind of cardiovascular event(s):</p> <p>_____</p> <p>If YES indicate date(s) of onset of new event(s) since last visit (DD/MM/YY):</p> <p>1)                              </p> <p>2)                              </p> <p>3)                              </p> |
| <p>Did the patient have any episodes of <u>pneumonia</u> since the last visit?</p>                                        | <input type="checkbox"/> Yes<br><input type="checkbox"/> No | <p>If YES indicate date(s) of onset of pneumonia since last visit (DD/MM/YY):</p> <p>1)                              </p> <p>2)                              </p> <p>3)                              </p>                                                                         |
| <p>Did the patient have any <u>other significant occurring event</u> since the last visit?</p>                            | <input type="checkbox"/> Yes<br><input type="checkbox"/> No | <p>If YES, specify event(s):</p> <p>_____</p> <p>If YES indicate date(s) of onset of new event(s) since last visit (DD/MM/YY):</p> <p>1)                              </p> <p>2)                              </p> <p>3)                              </p>                        |

Has the patient experienced at least one of the above events since the last visit (i.e. did you answer YES to any of the above questions)?

No  Yes\*

\* If YES please fax a copy of pages 51-52 to CROM as indicated in the Study Procedures Handbook.



Centre No. | | | | | Screen. No. | | | | | Randomisation No. | | | | | Pat. Init. | | | | |  
Family name Name

### TELEPHONE CONTACT – Day 60

Visit date | | | | | at | | | | |  
D D M M Y Y HOUR MINUTES

### MEDICATION SINCE THE LAST VISIT

Has any medication been instituted, stopped and/or modified (dose change) since the last visit?  No  Yes

*If YES please complete the following details, including only medications instituted, stopped and/or modified (dose change) since the last visit.*

| Trade name | Indication | Posology |      | Route | Administration (DD/MM/YY) |                       |
|------------|------------|----------|------|-------|---------------------------|-----------------------|
|            |            | Dose/day | Unit |       | Start date                | End date (or ONGOING) |
|            |            |          |      |       |                           |                       |
|            |            |          |      |       |                           |                       |
|            |            |          |      |       |                           |                       |
|            |            |          |      |       |                           |                       |
|            |            |          |      |       |                           |                       |
|            |            |          |      |       |                           |                       |
|            |            |          |      |       |                           |                       |

### PHARMACOECONOMIC QUESTIONNAIRE

Please remind to fill in the pharmacoeconomic questionnaire and enclose it in the plastic envelope

### INVESTIGATOR'S STATEMENT

I confirm that the data herein is a true complete and accurate reflection of this subject participation in the study, according to the protocol procedures.

Investigator's name: .....

Investigator's signature: .....

Date: | | | | |  
D D M M Y Y

Centre No. | | | | | Screen. No. | | | | | Randomisation No. | | | | | Pat. Init. | | | | |  
Family name Name

## VISIT 6 – Day 90

Visit date | | | | | | | | | | | | | | | at | | | | | | | | | | | | | | |  
D D M M Y Y HOUR MINUTES

Has the patient withdrawn prematurely from the study?

Yes

No

If Yes, please fill in the “**Investigator's statement**” at the end of visit 6 and the “**Study Conclusion Summary/Wihtdrawal/Drop-out Form**”.

**VISIT 6 – Day 90**

Visit date | | | | | | | | | | | | | | | at | | | | | | | | | | | | | | |  
D D M M Y Y HOUR MINUTES

**OCCURRING EVENTS**

**PLEASE COMPLETE THE FOLLOWING TABLE:**

|                                                                                                                                                                                                                                                                                                                                                                                                                                                                 |                                                                     |                                                                                                                                                                                                                                                                                                                                                                                                                                                            |
|-----------------------------------------------------------------------------------------------------------------------------------------------------------------------------------------------------------------------------------------------------------------------------------------------------------------------------------------------------------------------------------------------------------------------------------------------------------------|---------------------------------------------------------------------|------------------------------------------------------------------------------------------------------------------------------------------------------------------------------------------------------------------------------------------------------------------------------------------------------------------------------------------------------------------------------------------------------------------------------------------------------------|
| <p>Did the patient have at least one COPD exacerbation* since the last visit?<br/>                 (*defined as:<br/>                 - worsening of respiratory symptoms requiring treatment with antibiotics and/or systemic steroids since last visit<br/>                 - and/or new hospital admission for a COPD exacerbation since last visit<br/>                 - and/or need for ventilatory support or intubation, or death since last visit)</p> | <p><input type="checkbox"/> Yes<br/><input type="checkbox"/> No</p> | <p>If YES indicate date(s) of onset of new COPD exacerbation(s) since last visit (DD/MM/YY):</p> <p>1)                              <br/>                 2)                              <br/>                 3)                              </p>                                                                                                                                                                                                       |
| <p>Was the patient hospitalized <u>for a new COPD exacerbation</u> since the last visit?</p>                                                                                                                                                                                                                                                                                                                                                                    | <p><input type="checkbox"/> Yes<br/><input type="checkbox"/> No</p> | <p>If YES indicate date(s) of new hospitalization(s) for COPD exacerbation(s) since last visit (from DD/MM/YY to DD/MM/YY):</p> <p>1) from                               to                              <br/>                 2) from                               to                              <br/>                 3) from                               to                              </p>                                                      |
| <p>Was the patient hospitalized <u>for any other cause</u> (except COPD) since the last visit?</p>                                                                                                                                                                                                                                                                                                                                                              | <p><input type="checkbox"/> Yes<br/><input type="checkbox"/> No</p> | <p>If YES, specify reason(s) for hospitalization(s):</p> <p>_____</p> <p>If YES, please indicate date(s) of new hospitalization(s) since last visit (from DD/MM/YY to DD/MM/YY):</p> <p>1) from                               to                              <br/>                 2) from                               to                              <br/>                 3) from                               to                              </p> |
| <p>Was the patient admitted to an Intensive Care Unit <u>for any cause</u> since the last visit?</p>                                                                                                                                                                                                                                                                                                                                                            | <p><input type="checkbox"/> Yes<br/><input type="checkbox"/> No</p> | <p>If YES, specify reason(s) for admission(s) to ICU:</p> <p>_____</p> <p>If YES, please indicate date(s) of admission(s) to ICU since last visit (from DD/MM/YY to DD/MM/YY):</p> <p>1) from                               to                              <br/>                 2) from                               to                              <br/>                 3) from                               to                              </p>   |

**VISIT 6 – Day 90**

Visit date | | | | | | | | | | | | | | | at | | | | | | | | | | | | | | |  
D D M M Y Y HOUR MINUTES

**OCCURRING EVENTS (continued)**

|                                                                                                                           |                                                                     |                                                                                                                                                                                                                                                                                                                             |
|---------------------------------------------------------------------------------------------------------------------------|---------------------------------------------------------------------|-----------------------------------------------------------------------------------------------------------------------------------------------------------------------------------------------------------------------------------------------------------------------------------------------------------------------------|
| <p>Did the patient have any episode(s) of <u>pulmonary embolism</u> since the last visit?</p>                             | <p><input type="checkbox"/> Yes<br/><input type="checkbox"/> No</p> | <p>If YES indicate date(s) of onset of episode(s) of pulmonary embolism since last visit (DD/MM/YY):</p> <p>1)                              <br/>                 2)                              <br/>                 3)                              </p>                                                                |
| <p>Did the patient have any <u>cardiovascular events, including acute onset pulmonary edema</u> since the last visit?</p> | <p><input type="checkbox"/> Yes<br/><input type="checkbox"/> No</p> | <p>If YES, specify kind of cardiovascular event(s):<br/>                 _____</p> <p>If YES indicate date(s) of onset of new event(s) since last visit (DD/MM/YY):</p> <p>1)                              <br/>                 2)                              <br/>                 3)                              </p> |
| <p>Did the patient have any episodes of <u>pneumonia</u> since the last visit?</p>                                        | <p><input type="checkbox"/> Yes<br/><input type="checkbox"/> No</p> | <p>If YES indicate date(s) of onset of pneumonia since last visit (DD/MM/YY):</p> <p>1)                              <br/>                 2)                              <br/>                 3)                              </p>                                                                                       |
| <p>Did the patient have <u>any other significant occurring event</u> since the last visit?</p>                            | <p><input type="checkbox"/> Yes<br/><input type="checkbox"/> No</p> | <p>If YES, specify event(s):<br/>                 _____</p> <p>If YES indicate date(s) of onset of new event(s) since last visit (DD/MM/YY):</p> <p>1)                              <br/>                 2)                              <br/>                 3)                              </p>                        |

Has the patient experienced at least one of the above events since the last visit (i.e. did you answer YES to any of the above questions)?

No  Yes\*

\* If YES please fax a copy of pages 55-56 to CROM as indicated in the Study Procedures Handbook.

Centre No. | | | | | Screen. No. | | | | | Randomisation No. | | | | | Pat. Init. | | | | |  
Family name Name

**VISIT 6 – Day 90**

Visit date | | | | | at | | | | |  
D D M M Y Y HOUR MINUTES

**MEDICATION SINCE THE LAST VISIT**

Has any medication been instituted, stopped and/or modified (dose change) since the last visit?  No  Yes

*If YES please complete the following details, including only medications instituted, stopped and/or modified (dose change) since the last visit.*

| Trade name | Indication | Posology |      | Route | Administration (DD/MM/YY) |                       |
|------------|------------|----------|------|-------|---------------------------|-----------------------|
|            |            | Dose/day | Unit |       | Start date                | End date (or ONGOING) |
|            |            |          |      |       |                           |                       |
|            |            |          |      |       |                           |                       |
|            |            |          |      |       |                           |                       |
|            |            |          |      |       |                           |                       |
|            |            |          |      |       |                           |                       |
|            |            |          |      |       |                           |                       |
|            |            |          |      |       |                           |                       |
|            |            |          |      |       |                           |                       |

Centre No. | | | | | Screen. No. | | | | | Randomisation No. | | | | | Pat. Init. | | | | |  
Family name Name

**VISIT 6 – Day 90**

Visit date | | | | | | | | | | | | | | | at | | | | | | | | | | | | | | |  
D D M M Y Y HOUR MINUTES

**PHYSICAL EXAMINATION**

| Physical examination                | Status                                                                                                    | Comments: if "abnormal" specify: |
|-------------------------------------|-----------------------------------------------------------------------------------------------------------|----------------------------------|
| Cardiovascular system               | <input type="checkbox"/> Abnormal<br><input type="checkbox"/> Normal<br><input type="checkbox"/> Not done |                                  |
| Respiratory system<br>(except COPD) | <input type="checkbox"/> Abnormal<br><input type="checkbox"/> Normal<br><input type="checkbox"/> Not done |                                  |
| Lymphatic system                    | <input type="checkbox"/> Abnormal<br><input type="checkbox"/> Normal<br><input type="checkbox"/> Not done |                                  |
| Neurological-locomotor system       | <input type="checkbox"/> Abnormal<br><input type="checkbox"/> Normal<br><input type="checkbox"/> Not done |                                  |
| Skin                                | <input type="checkbox"/> Abnormal<br><input type="checkbox"/> Normal<br><input type="checkbox"/> Not done |                                  |
| Endocrine                           | <input type="checkbox"/> Abnormal<br><input type="checkbox"/> Normal<br><input type="checkbox"/> Not done |                                  |
| Ear-nose-throat system              | <input type="checkbox"/> Abnormal<br><input type="checkbox"/> Normal<br><input type="checkbox"/> Not done |                                  |
| Ophthalmological system             | <input type="checkbox"/> Abnormal<br><input type="checkbox"/> Normal<br><input type="checkbox"/> Not done |                                  |
| Gastrointestinal system             | <input type="checkbox"/> Abnormal<br><input type="checkbox"/> Normal<br><input type="checkbox"/> Not done |                                  |
| Others<br>.....                     | <input type="checkbox"/> Abnormal<br><input type="checkbox"/> Normal<br><input type="checkbox"/> Not done |                                  |

**VITAL SIGNS**

| SITTING BLOOD PRESSURE<br>(mmHg) |           | SITTING HEART RATE<br>(bpm) |
|----------------------------------|-----------|-----------------------------|
| Systolic                         | Diastolic |                             |
|                                  |           |                             |

Centre No. | | | | | Screen. No. | | | | | Randomisation No. | | | | | Pat. Init. | | | | |  
Family name Name

## VISIT 6 – Day 90

Visit date | | | | | at | | | | |  
D D M M Y Y HOUR MINUTES

### LABORATORY TESTS

Collect blood sample for haematology and blood chemistry.  
 LOCAL LABORATORY

| Haematology tests *            |                 | Clinically Significant ** |    |
|--------------------------------|-----------------|---------------------------|----|
|                                |                 | Yes                       | No |
| Haemoglobin (mmol/L)           | .               |                           |    |
| Haematocrit (L/L)              | .               |                           |    |
| RBC (10 <sup>12</sup> /L)      | .               |                           |    |
| WBC (10 <sup>9</sup> /L)       | .               |                           |    |
| WBC (differential counts)      | Neutrophils (%) | .                         |    |
|                                | Eosinophils (%) | .                         |    |
|                                | Basophils (%)   | .                         |    |
|                                | Monocytes (%)   | .                         |    |
|                                | Lymphocytes (%) | .                         |    |
| Platelet (10 <sup>9</sup> /L)  |                 |                           |    |
| <b>Blood Chemistry tests *</b> |                 |                           |    |
| Alkaline Phosphatase (U/L)     | .               |                           |    |
| AST (SGOT) (U/L)               | .               |                           |    |
| ALT (SGPT) (U/L)               | .               |                           |    |
| BUN/blood urea (mmol/L)        | .               |                           |    |
| Creatinine Kinase (U/L)        | .               |                           |    |
| Creatinine (µmol/L)            | .               |                           |    |
| Gamma-GT (U/L)                 | .               |                           |    |
| Sodium (mmol/L)                | .               |                           |    |
| Potassium (mmol/L)             | .               |                           |    |
| Glucose (mmol/L)               | .               |                           |    |

\* to be filled in as soon as results are available

\*\* For the out of range values, please specify if the abnormality is clinically or not clinically significant

**Laboratory results need to be stored in the patient's file**

**VISIT 6 – Day 90**

Visit date |\_\_|\_\_|\_\_|\_\_|\_\_|\_\_|\_\_|\_\_|\_\_|\_\_| at |\_\_|\_\_|\_\_|\_\_|\_\_|\_\_|  
D D M M Y Y HOUR MINUTES

**Pro-calcitonin (pro-ct)**

Has the blood sample been taken for the pro-ct analysis?

Yes No

If Yes, refer to the Study Procedures Handbook for handling and storage.

If No, please specify why: \_\_\_\_\_

Please fill in as soon as the results are available:

Pro-calcitonin (mcg/L) |\_\_|\_\_|\_\_|.|\_\_|\_\_|\_\_|

**C-reactive protein (CRP), serum amyloid (SAA) and RANTES**

Has the blood sample been taken for the CRP, SAA and RANTES analysis?

Yes No

If Yes, refer to the Study Procedures Handbook for handling and storage.

If No, please specify why: \_\_\_\_\_

Please fill in as soon as the results are available:

CRP (mg/L) |\_\_|\_\_|\_\_|.|\_\_|\_\_|\_\_|

SAA (mg/L) |\_\_|\_\_|\_\_|.|\_\_|\_\_|\_\_|

RANTES (mcg/L) |\_\_|\_\_|\_\_|.|\_\_|\_\_|\_\_|

**PTX-3 and IL1 decoy**

Has the blood sample been taken for the PTX-3 and IL1 decoy analysis?

Yes No

If Yes, refer to the Study Procedures Handbook for handling and storage.

If No, please specify why: \_\_\_\_\_

Please fill in as soon as the results are available:

PTX-3 (ng/ml) |\_\_|\_\_|\_\_|\_\_|.|\_\_|\_\_|\_\_|

IL1 decoy (ng/ml) |\_\_|\_\_|\_\_|\_\_|.|\_\_|\_\_|\_\_|



Centre No. |\_\_|\_\_|\_\_|\_\_| Screen. No. |\_\_|\_\_|\_\_|\_\_| Randomisation No. |\_\_|\_\_|\_\_|\_\_| Pat. Init. |\_\_|\_\_|\_\_|\_\_|  
Family name Name

## VISIT 6 – Day 90

Visit date |\_\_|\_\_|\_\_|\_\_|\_\_|\_\_|\_\_|\_\_|\_\_|\_\_| at |\_\_|\_\_|\_\_|\_\_|\_\_|\_\_|  
D D M M Y Y HOUR MINUTES

### QUESTIONNAIRES FOR RESPIRATORY SYMPTOMS/QUALITY OF LIFE

SF36 score: total |\_\_|\_\_|\_\_|\_\_|

BDI score: total |\_\_|\_\_|\_\_|\_\_|

TDI score: total |\_\_|\_\_|\_\_|\_\_|

CCIQ Score: total |\_\_|\_\_|\_\_|\_\_|

### PHARMACOECONOMIC QUESTIONNAIRE

Please remind to fill in the pharmacoeconomic questionnaire and enclose it in the plastic envelope.

### SPIROMETRY

- SPIROMETRY:** from 3 acceptable spirometric manoeuvres record the highest FEV<sub>1</sub> and FVC, irrespective of the manoeuvre (curve) they come from.

date |\_\_|\_\_|\_\_|\_\_|\_\_|\_\_| at |\_\_|\_\_|\_\_|\_\_|\_\_|\_\_|  
HOUR MINUTES

|                                                   |                                          |
|---------------------------------------------------|------------------------------------------|
| <b>FVC</b>                                        | __ ,  __ __ __ __  litre                 |
| <b>FEV<sub>1</sub></b>                            | __ ,  __ __ __ __  litre                 |
| <b>FEV<sub>1</sub> predicted normal value</b>     | __ ,  __ __ __ __  litre [ERS standards] |
| <b>FEV<sub>1</sub> (% predicted normal value)</b> | __ __  % of predicted value              |
| <b>FEV<sub>1</sub>/FVC (%)</b>                    | __ __ __ ,  __  %                        |

**VISIT 6 – Day 90**

Visit date |\_\_|\_\_|\_\_|\_\_|\_\_|\_\_|\_\_|\_\_| at |\_\_|\_\_|\_\_|\_\_|  
D D M M Y Y HOUR MINUTES

**ARTERIAL BLOOD GASES**

|                                                                    | Yes                      | No                       |
|--------------------------------------------------------------------|--------------------------|--------------------------|
| Arterial blood gas analysis performed:                             | <input type="checkbox"/> | <input type="checkbox"/> |
| <b>If YES:</b> patient was under O <sub>2</sub> therapy?           | <input type="checkbox"/> | <input type="checkbox"/> |
| <b>If patient was under O<sub>2</sub> therapy</b> please indicate: |                          |                          |
| - how many L/min:  __ , __                                         |                          |                          |
| - how many hours/day:  __ __                                       |                          |                          |

If arterial blood gas analysis was performed, indicate:

pH: |\_\_|,|\_\_|\_\_|  
 PaO<sub>2</sub>: |\_\_|\_\_|\_\_| mmHg  
 PaCO<sub>2</sub>: |\_\_|\_\_|\_\_| mmHg  
 SO<sub>2</sub>: |\_\_|\_\_|\_\_| %  
 HCO<sub>3</sub><sup>-</sup>: |\_\_|\_\_|\_\_| mmol/L

**INVESTIGATOR'S STATEMENT**

I confirm that the data herein is a true complete and accurate reflection of this subject participation in the study, according to the protocol procedures.

Investigator's name: .....

Investigator's signature: .....

Date: |\_\_|\_\_|\_\_|\_\_|\_\_|\_\_|\_\_|\_\_|  
D D M M Y Y

Centre No. | | | | | Screen. No. | | | | | Randomisation No. | | | | | Pat. Init. | | | | |  
Family name Name

## TELEPHONE CONTACT – Day 120

Visit date | | | | | at | | | | |  
D D M M Y Y HOUR MINUTES

### CLINICAL STATUS

| Collect information on              | Status                                                                                                    | Comments: if "abnormal" specify: |
|-------------------------------------|-----------------------------------------------------------------------------------------------------------|----------------------------------|
| 1. Cardiovascular system            | <input type="checkbox"/> Abnormal<br><input type="checkbox"/> Normal<br><input type="checkbox"/> Not done |                                  |
| 2. Respiratory system (except COPD) | <input type="checkbox"/> Abnormal<br><input type="checkbox"/> Normal<br><input type="checkbox"/> Not done |                                  |
| 3. Lymphatic system                 | <input type="checkbox"/> Abnormal<br><input type="checkbox"/> Normal<br><input type="checkbox"/> Not done |                                  |
| 4. Neurological-locomotor system    | <input type="checkbox"/> Abnormal<br><input type="checkbox"/> Normal<br><input type="checkbox"/> Not done |                                  |
| 5. Skin                             | <input type="checkbox"/> Abnormal<br><input type="checkbox"/> Normal<br><input type="checkbox"/> Not done |                                  |
| 6. Endocrine                        | <input type="checkbox"/> Abnormal<br><input type="checkbox"/> Normal<br><input type="checkbox"/> Not done |                                  |
| 7. Ear-nose-throat system           | <input type="checkbox"/> Abnormal<br><input type="checkbox"/> Normal<br><input type="checkbox"/> Not done |                                  |
| 8. Ophthalmological system          | <input type="checkbox"/> Abnormal<br><input type="checkbox"/> Normal<br><input type="checkbox"/> Not done |                                  |
| 9. Gastrointestinal system          | <input type="checkbox"/> Abnormal<br><input type="checkbox"/> Normal<br><input type="checkbox"/> Not done |                                  |
| 10. Others<br>.....                 | <input type="checkbox"/> Abnormal<br><input type="checkbox"/> Normal<br><input type="checkbox"/> Not done |                                  |

## TELEPHONE CONTACT – Day 120

Visit date | | | | | | | | | | | | | | | at | | | | | | | | | | | | | | |  
D D M M Y Y HOUR MINUTES

### OCCURRING EVENTS

PLEASE COMPLETE THE FOLLOWING TABLE:

|                                                                                                                                                                                                                                                                                                                                                                                                                                                                      |                                                             |                                                                                                                                                                                                                                                                                                                                                                                                                                |
|----------------------------------------------------------------------------------------------------------------------------------------------------------------------------------------------------------------------------------------------------------------------------------------------------------------------------------------------------------------------------------------------------------------------------------------------------------------------|-------------------------------------------------------------|--------------------------------------------------------------------------------------------------------------------------------------------------------------------------------------------------------------------------------------------------------------------------------------------------------------------------------------------------------------------------------------------------------------------------------|
| <p>Did the patient have at least one COPD exacerbation* since the last visit?<br/>                 (*defined as:</p> <ul style="list-style-type: none"> <li>- worsening of respiratory symptoms requiring treatment with antibiotics and/or systemic steroids since last visit</li> <li>- and/or new hospital admission for a COPD exacerbation since last visit</li> <li>- and/or need for ventilatory support or intubation, or death since last visit)</li> </ul> | <input type="checkbox"/> Yes<br><input type="checkbox"/> No | <p>If YES indicate date(s) of onset of new COPD exacerbation(s) since last visit (DD/MM/YY):</p> <p>1)                              </p> <p>2)                              </p> <p>3)                              </p>                                                                                                                                                                                                       |
| <p>Was the patient hospitalized <u>for a new COPD exacerbation</u> since the last visit?</p>                                                                                                                                                                                                                                                                                                                                                                         | <input type="checkbox"/> Yes<br><input type="checkbox"/> No | <p>If YES indicate date(s) of new hospitalization(s) for COPD exacerbation(s) since last visit (from DD/MM/YY to DD/MM/YY):</p> <p>1) from                               to                              </p> <p>2) from                               to                              </p> <p>3) from                               to                              </p>                                                      |
| <p>Was the patient hospitalized <u>for any other cause</u> (except COPD) since the last visit?</p>                                                                                                                                                                                                                                                                                                                                                                   | <input type="checkbox"/> Yes<br><input type="checkbox"/> No | <p>If YES, specify reason(s) for hospitalization(s):</p> <p>_____</p> <p>If YES, please indicate date(s) of new hospitalization(s) since last visit (from DD/MM/YY to DD/MM/YY):</p> <p>1) from                               to                              </p> <p>2) from                               to                              </p> <p>3) from                               to                              </p> |
| <p>Was the patient admitted to an Intensive Care Unit <u>for any cause</u> since the last visit?</p>                                                                                                                                                                                                                                                                                                                                                                 | <input type="checkbox"/> Yes<br><input type="checkbox"/> No | <p>If YES, specify reason(s) for admission(s) to ICU:</p> <p>_____</p> <p>If YES, please indicate date(s) of admission(s) to ICU since last visit (from DD/MM/YY to DD/MM/YY):</p> <p>1) from                               to                              </p> <p>2) from                               to                              </p> <p>3) from                               to                              </p>   |

**TELEPHONE CONTACT – Day 120**

Visit date | | | | | | | | | | | | | | at | | | | | | | | | | | | | |  
D D M M Y Y HOUR MINUTES

**OCCURRING EVENTS (continued)**

|                                                                                                                           |                                                             |                                                                                                                                                                                                                                                                             |
|---------------------------------------------------------------------------------------------------------------------------|-------------------------------------------------------------|-----------------------------------------------------------------------------------------------------------------------------------------------------------------------------------------------------------------------------------------------------------------------------|
| <p>Did the patient have any episode(s) of <u>pulmonary embolism</u> since the last visit?</p>                             | <input type="checkbox"/> Yes<br><input type="checkbox"/> No | <p>If YES indicate date(s) of onset of episode(s) of pulmonary embolism since last visit (DD/MM/YY):</p> <p>1)                            </p> <p>2)                            </p> <p>3)                            </p>                                                  |
| <p>Did the patient have any <u>cardiovascular events, including acute onset pulmonary edema</u> since the last visit?</p> | <input type="checkbox"/> Yes<br><input type="checkbox"/> No | <p>If YES, specify kind of cardiovascular event(s):</p> <p>_____</p> <p>If YES indicate date(s) of onset of new event(s) since last visit (DD/MM/YY):</p> <p>1)                            </p> <p>2)                            </p> <p>3)                            </p> |
| <p>Did the patient have any episodes of <u>pneumonia</u> since the last visit?</p>                                        | <input type="checkbox"/> Yes<br><input type="checkbox"/> No | <p>If YES indicate date(s) of onset of pneumonia since last visit (DD/MM/YY):</p> <p>1)                            </p> <p>2)                            </p> <p>3)                            </p>                                                                         |
| <p>Did the patient have <u>any other significant occurring event</u> since the last visit?</p>                            | <input type="checkbox"/> Yes<br><input type="checkbox"/> No | <p>If YES, specify event(s):</p> <p>_____</p> <p>If YES indicate date(s) of onset of new event(s) since last visit (DD/MM/YY):</p> <p>1)                            </p> <p>2)                            </p> <p>3)                            </p>                        |

**Has the patient experienced at least one of the above events since the last visit (i.e. did you answer YES to any of the above questions)?**

No  Yes\*

\* If YES please fax a copy of pages 64-65 to CROM as indicated in the Study Procedures Handbook.

Centre No. | | | | | Screen. No. | | | | | Randomisation No. | | | | | Pat. Init. | | | | |  
Family name Name

**TELEPHONE CONTACT – Day 120**

Visit date | | | | | at | | | | |  
D D M M Y Y HOUR MINUTES

**MEDICATION SINCE THE LAST VISIT**

Has any medication been instituted, stopped and/or modified (dose change) since the last visit?  No  Yes

*If YES please complete the following details, including only medications instituted, stopped and/or modified (dose change) since the last visit.*

| Trade name | Indication | Posology |      | Route | Administration (DD/MM/YY) |                       |
|------------|------------|----------|------|-------|---------------------------|-----------------------|
|            |            | Dose/day | Unit |       | Start date                | End date (or ONGOING) |
|            |            |          |      |       |                           |                       |
|            |            |          |      |       |                           |                       |
|            |            |          |      |       |                           |                       |
|            |            |          |      |       |                           |                       |
|            |            |          |      |       |                           |                       |
|            |            |          |      |       |                           |                       |
|            |            |          |      |       |                           |                       |

**PHARMACOECONOMIC QUESTIONNAIRE**

Please remind to fill in the pharmacoeconomic questionnaire and enclose it in the plastic envelope.

**INVESTIGATOR'S STATEMENT**

I confirm that the data herein is a true complete and accurate reflection of this subject participation in the study, according to the protocol procedures.

Investigator's name: .....

Investigator's signature: .....

Date: | | | | |  
D D M M Y Y

Centre No. | | | | | Screen. No. | | | | | Randomisation No. | | | | | Pat. Init. | | | | |  
Family name Name

## TELEPHONE CONTACT – Day 150

Visit date | | | | | at | | | | |  
D D M M Y Y HOUR MINUTES

### CLINICAL STATUS

| Collect information on              | Status                                                                                                    | Comments: if "abnormal" specify: |
|-------------------------------------|-----------------------------------------------------------------------------------------------------------|----------------------------------|
| 1. Cardiovascular system            | <input type="checkbox"/> Abnormal<br><input type="checkbox"/> Normal<br><input type="checkbox"/> Not done |                                  |
| 2. Respiratory system (except COPD) | <input type="checkbox"/> Abnormal<br><input type="checkbox"/> Normal<br><input type="checkbox"/> Not done |                                  |
| 3. Lymphatic system                 | <input type="checkbox"/> Abnormal<br><input type="checkbox"/> Normal<br><input type="checkbox"/> Not done |                                  |
| 4. Neurological-locomotor system    | <input type="checkbox"/> Abnormal<br><input type="checkbox"/> Normal<br><input type="checkbox"/> Not done |                                  |
| 5. Skin                             | <input type="checkbox"/> Abnormal<br><input type="checkbox"/> Normal<br><input type="checkbox"/> Not done |                                  |
| 6. Endocrine                        | <input type="checkbox"/> Abnormal<br><input type="checkbox"/> Normal<br><input type="checkbox"/> Not done |                                  |
| 7. Ear-nose-throat system           | <input type="checkbox"/> Abnormal<br><input type="checkbox"/> Normal<br><input type="checkbox"/> Not done |                                  |
| 8. Ophthalmological system          | <input type="checkbox"/> Abnormal<br><input type="checkbox"/> Normal<br><input type="checkbox"/> Not done |                                  |
| 9. Gastrointestinal system          | <input type="checkbox"/> Abnormal<br><input type="checkbox"/> Normal<br><input type="checkbox"/> Not done |                                  |
| 10. Others<br>.....                 | <input type="checkbox"/> Abnormal<br><input type="checkbox"/> Normal<br><input type="checkbox"/> Not done |                                  |

## TELEPHONE CONTACT – Day 150

Visit date | | | | | | | | | | | | | | | at | | | | | | | | | | | | | | |  
D D M M Y Y HOUR MINUTES

### OCCURRING EVENTS

PLEASE COMPLETE THE FOLLOWING TABLE:

|                                                                                                                                                                                                                                                                                                                                                                                                                                                                      |                                                             |                                                                                                                                                                                                                                                                                                                                                                                                                                |
|----------------------------------------------------------------------------------------------------------------------------------------------------------------------------------------------------------------------------------------------------------------------------------------------------------------------------------------------------------------------------------------------------------------------------------------------------------------------|-------------------------------------------------------------|--------------------------------------------------------------------------------------------------------------------------------------------------------------------------------------------------------------------------------------------------------------------------------------------------------------------------------------------------------------------------------------------------------------------------------|
| <p>Did the patient have at least one COPD exacerbation* since the last visit?<br/>                 (*defined as:</p> <ul style="list-style-type: none"> <li>- worsening of respiratory symptoms requiring treatment with antibiotics and/or systemic steroids since last visit</li> <li>- and/or new hospital admission for a COPD exacerbation since last visit</li> <li>- and/or need for ventilatory support or intubation, or death since last visit)</li> </ul> | <input type="checkbox"/> Yes<br><input type="checkbox"/> No | <p>If YES indicate date(s) of onset of new COPD exacerbation(s) since last visit (DD/MM/YY):</p> <p>1)                              </p> <p>2)                              </p> <p>3)                              </p>                                                                                                                                                                                                       |
| <p>Was the patient hospitalized <u>for a new COPD exacerbation</u> since the last visit?</p>                                                                                                                                                                                                                                                                                                                                                                         | <input type="checkbox"/> Yes<br><input type="checkbox"/> No | <p>If YES indicate date(s) of new hospitalization(s) for COPD exacerbation(s) since last visit (from DD/MM/YY to DD/MM/YY):</p> <p>1) from                               to                              </p> <p>2) from                               to                              </p> <p>3) from                               to                              </p>                                                      |
| <p>Was the patient hospitalized <u>for any other cause</u> (except COPD) since the last visit?</p>                                                                                                                                                                                                                                                                                                                                                                   | <input type="checkbox"/> Yes<br><input type="checkbox"/> No | <p>If YES, specify reason(s) for hospitalization(s):</p> <p>_____</p> <p>If YES, please indicate date(s) of new hospitalization(s) since last visit (from DD/MM/YY to DD/MM/YY):</p> <p>1) from                               to                              </p> <p>2) from                               to                              </p> <p>3) from                               to                              </p> |
| <p>Was the patient admitted to an Intensive Care Unit <u>for any cause</u> since the last visit?</p>                                                                                                                                                                                                                                                                                                                                                                 | <input type="checkbox"/> Yes<br><input type="checkbox"/> No | <p>If YES, specify reason(s) for admission(s) to ICU:</p> <p>_____</p> <p>If YES, please indicate date(s) of admission(s) to ICU since last visit (from DD/MM/YY to DD/MM/YY):</p> <p>1) from                               to                              </p> <p>2) from                               to                              </p> <p>3) from                               to                              </p>   |



**TELEPHONE CONTACT – Day 150**

Visit date | | | | | | | | | | | | | | | at | | | | | | | | | | | | | | |  
D D M M Y Y HOUR MINUTES

**OCCURRING EVENTS (continued)**

|                                                                                                                           |                                                                     |                                                                                                                                                                                                                                                                                                                             |
|---------------------------------------------------------------------------------------------------------------------------|---------------------------------------------------------------------|-----------------------------------------------------------------------------------------------------------------------------------------------------------------------------------------------------------------------------------------------------------------------------------------------------------------------------|
| <p>Did the patient have any episode(s) of <u>pulmonary embolism</u> since the last visit?</p>                             | <p><input type="checkbox"/> Yes<br/><input type="checkbox"/> No</p> | <p>If YES indicate date(s) of onset of episode(s) of pulmonary embolism since last visit (DD/MM/YY):</p> <p>1)                              <br/>                 2)                              <br/>                 3)                              </p>                                                                |
| <p>Did the patient have any <u>cardiovascular events, including acute onset pulmonary edema</u> since the last visit?</p> | <p><input type="checkbox"/> Yes<br/><input type="checkbox"/> No</p> | <p>If YES, specify kind of cardiovascular event(s):<br/>                 _____</p> <p>If YES indicate date(s) of onset of new event(s) since last visit (DD/MM/YY):</p> <p>1)                              <br/>                 2)                              <br/>                 3)                              </p> |
| <p>Did the patient have any episodes of <u>pneumonia</u> since the last visit?</p>                                        | <p><input type="checkbox"/> Yes<br/><input type="checkbox"/> No</p> | <p>If YES indicate date(s) of onset of pneumonia since last visit (DD/MM/YY):</p> <p>1)                              <br/>                 2)                              <br/>                 3)                              </p>                                                                                       |
| <p>Did the patient have any <u>other significant occurring event</u> since the last visit?</p>                            | <p><input type="checkbox"/> Yes<br/><input type="checkbox"/> No</p> | <p>If YES, specify event(s):<br/>                 _____</p> <p>If YES indicate date(s) of onset of new event(s) since last visit (DD/MM/YY):</p> <p>1)                              <br/>                 2)                              <br/>                 3)                              </p>                        |

Has the patient experienced at least one of the above events since the last visit (i.e. did you answer YES to any of the above questions)?

No  Yes\*

\* If YES please fax a copy of pages 68-69 to CROM as indicated in the Study Procedures Handbook.

Centre No. | | | | | Screen. No. | | | | | Randomisation No. | | | | | Pat. Init. | | | | |  
Family name Name

**TELEPHONE CONTACT – Day 150**

Visit date | | | | | | | | | | | | | | | at | | | | | | | | | | | | | | |  
D D M M Y Y HOUR MINUTES

**MEDICATION SINCE THE LAST VISIT**

Has any medication been instituted, stopped and/or modified (dose change) since the last visit?  No  Yes

*If YES please complete the following details, including only medications instituted, stopped and/or modified (dose change) since the last visit.*

| Trade name | Indication | Posology |      | Route | Administration (DD/MM/YY) |                       |
|------------|------------|----------|------|-------|---------------------------|-----------------------|
|            |            | Dose/day | Unit |       | Start date                | End date (or ONGOING) |
|            |            |          |      |       |                           |                       |
|            |            |          |      |       |                           |                       |
|            |            |          |      |       |                           |                       |
|            |            |          |      |       |                           |                       |
|            |            |          |      |       |                           |                       |
|            |            |          |      |       |                           |                       |
|            |            |          |      |       |                           |                       |

**PHARMACOECONOMIC QUESTIONNAIRE**

Please remind to fill in the pharmacoeconomic questionnaire and enclose it in the plastic envelope.

**INVESTIGATOR'S STATEMENT**

I confirm that the data herein is a true complete and accurate reflection of this subject participation in the study, according to the protocol procedures.

Investigator's name: .....

Investigator's signature: .....

Date: | | | | | | | | | | | | | | |  
D D M M Y Y

Centre No. | | | | | Screen. No. | | | | | Randomisation No. | | | | | Pat. Init. | | | | |  
Family name Name

## VISIT 7 – Day 180

Visit date | | | | | | | | | | | | | | | at | | | | | | | | | | |  
D D M M Y Y HOUR MINUTES

Has the patient withdrawn prematurely from the study?

Yes

No

If Yes, please fill in the “**Investigator's statement**” at the end of visit 7 and the “**Study Conclusion Summary/Wihtdrawal/Drop-out Form**”.

**VISIT 7 – Day 180**

Visit date | | | | | | | | | | | | | | | at | | | | | | | | | | | | | | |  
D D M M Y Y HOUR MINUTES

**OCCURRING EVENTS**

**PLEASE COMPLETE THE FOLLOWING TABLE:**

|                                                                                                                                                                                                                                                                                                                                                                                                                                                                      |                                                             |                                                                                                                                                                                                                                                                                                                                                                                                                                |
|----------------------------------------------------------------------------------------------------------------------------------------------------------------------------------------------------------------------------------------------------------------------------------------------------------------------------------------------------------------------------------------------------------------------------------------------------------------------|-------------------------------------------------------------|--------------------------------------------------------------------------------------------------------------------------------------------------------------------------------------------------------------------------------------------------------------------------------------------------------------------------------------------------------------------------------------------------------------------------------|
| <p>Did the patient have at least one COPD exacerbation* since the last visit?<br/>                 (*defined as:</p> <ul style="list-style-type: none"> <li>- worsening of respiratory symptoms requiring treatment with antibiotics and/or systemic steroids since last visit</li> <li>- and/or new hospital admission for a COPD exacerbation since last visit</li> <li>- and/or need for ventilatory support or intubation, or death since last visit)</li> </ul> | <input type="checkbox"/> Yes<br><input type="checkbox"/> No | <p>If YES indicate date(s) of onset of new COPD exacerbation(s) since last visit (DD/MM/YY):</p> <p>1)                              </p> <p>2)                              </p> <p>3)                              </p>                                                                                                                                                                                                       |
| <p>Was the patient hospitalized <u>for a new COPD exacerbation</u> since the last visit?</p>                                                                                                                                                                                                                                                                                                                                                                         | <input type="checkbox"/> Yes<br><input type="checkbox"/> No | <p>If YES indicate date(s) of new hospitalization(s) for COPD exacerbation(s) since last visit (from DD/MM/YY to DD/MM/YY):</p> <p>1) from                               to                              </p> <p>2) from                               to                              </p> <p>3) from                               to                              </p>                                                      |
| <p>Was the patient hospitalized <u>for any other cause</u> (except COPD) since the last visit?</p>                                                                                                                                                                                                                                                                                                                                                                   | <input type="checkbox"/> Yes<br><input type="checkbox"/> No | <p>If YES, specify reason(s) for hospitalization(s):</p> <p>_____</p> <p>If YES, please indicate date(s) of new hospitalization(s) since last visit (from DD/MM/YY to DD/MM/YY):</p> <p>1) from                               to                              </p> <p>2) from                               to                              </p> <p>3) from                               to                              </p> |
| <p>Was the patient admitted to an Intensive Care Unit <u>for any cause</u> since the last visit?</p>                                                                                                                                                                                                                                                                                                                                                                 | <input type="checkbox"/> Yes<br><input type="checkbox"/> No | <p>If YES, specify reason(s) for admission(s) to ICU:</p> <p>_____</p> <p>If YES, please indicate date(s) of admission(s) to ICU since last visit (from DD/MM/YY to DD/MM/YY):</p> <p>1) from                               to                              </p> <p>2) from                               to                              </p> <p>3) from                               to                              </p>   |

**VISIT 7 – Day 180**

Visit date | | | | | | | | | | | | | | | at | | | | | | | | | | | | | | |  
D D M M Y Y HOUR MINUTES

**OCCURRING EVENTS (continued)**

|                                                                                                                           |                                                                     |                                                                                                                                                                                                                                                                                                                             |
|---------------------------------------------------------------------------------------------------------------------------|---------------------------------------------------------------------|-----------------------------------------------------------------------------------------------------------------------------------------------------------------------------------------------------------------------------------------------------------------------------------------------------------------------------|
| <p>Did the patient have any episode(s) of <u>pulmonary embolism</u> since the last visit?</p>                             | <p><input type="checkbox"/> Yes<br/><input type="checkbox"/> No</p> | <p>If YES indicate date(s) of onset of episode(s) of pulmonary embolism since last visit (DD/MM/YY):</p> <p>1)                              <br/>                 2)                              <br/>                 3)                              </p>                                                                |
| <p>Did the patient have any <u>cardiovascular events, including acute onset pulmonary edema</u> since the last visit?</p> | <p><input type="checkbox"/> Yes<br/><input type="checkbox"/> No</p> | <p>If YES, specify kind of cardiovascular event(s):<br/>                 _____</p> <p>If YES indicate date(s) of onset of new event(s) since last visit (DD/MM/YY):</p> <p>1)                              <br/>                 2)                              <br/>                 3)                              </p> |
| <p>Did the patient have any episodes of <u>pneumonia</u> since the last visit?</p>                                        | <p><input type="checkbox"/> Yes<br/><input type="checkbox"/> No</p> | <p>If YES indicate date(s) of onset of pneumonia since last visit (DD/MM/YY):</p> <p>1)                              <br/>                 2)                              <br/>                 3)                              </p>                                                                                       |
| <p>Did the patient have any <u>other significant occurring event</u> since the last visit?</p>                            | <p><input type="checkbox"/> Yes<br/><input type="checkbox"/> No</p> | <p>If YES, specify event(s):<br/>                 _____</p> <p>If YES indicate date(s) of onset of new event(s) since last visit (DD/MM/YY):</p> <p>1)                              <br/>                 2)                              <br/>                 3)                              </p>                        |

Has the patient experienced at least one of the above events since the last visit (i.e. did you answer YES to any of the above questions)?

No  Yes\*

\* If YES please fax a copy of pages 72-73 to CROM as indicated in the Study Procedures Handbook.

Centre No. | | | | Screen. No. | | | | Randomisation No. | | | | Pat. Init. | | | |  
Family name Name

**VISIT 7 – Day 180**

Visit date | | | | | | | | | | | | at | | | | | | | |  
D D M M Y Y HOUR MINUTES

**MEDICATION SINCE THE LAST VISIT**

Has any medication been instituted, stopped and/or modified (dose change) since the last visit?  No  Yes

*If YES please complete the following details, including only medications instituted, stopped and/or modified (dose change) since the last visit.*

| Trade name | Indication | Posology |      | Route | Administration (DD/MM/YY) |                       |
|------------|------------|----------|------|-------|---------------------------|-----------------------|
|            |            | Dose/day | Unit |       | Start date                | End date (or ONGOING) |
|            |            |          |      |       |                           |                       |
|            |            |          |      |       |                           |                       |
|            |            |          |      |       |                           |                       |
|            |            |          |      |       |                           |                       |
|            |            |          |      |       |                           |                       |
|            |            |          |      |       |                           |                       |
|            |            |          |      |       |                           |                       |
|            |            |          |      |       |                           |                       |

Centre No. | | | | | Screen. No. | | | | | Randomisation No. | | | | | Pat. Init. | | | | |  
Family name Name

**VISIT 7 – Day 180**

Visit date | | | | | at | | | | |  
D D M M Y Y HOUR MINUTES

**PHYSICAL EXAMINATION**

| Physical examination                | Status                                                                                                    | Comments: if "abnormal" specify: |
|-------------------------------------|-----------------------------------------------------------------------------------------------------------|----------------------------------|
| Cardiovascular system               | <input type="checkbox"/> Abnormal<br><input type="checkbox"/> Normal<br><input type="checkbox"/> Not done |                                  |
| Respiratory system<br>(except COPD) | <input type="checkbox"/> Abnormal<br><input type="checkbox"/> Normal<br><input type="checkbox"/> Not done |                                  |
| Lymphatic system                    | <input type="checkbox"/> Abnormal<br><input type="checkbox"/> Normal<br><input type="checkbox"/> Not done |                                  |
| Neurological-locomotor system       | <input type="checkbox"/> Abnormal<br><input type="checkbox"/> Normal<br><input type="checkbox"/> Not done |                                  |
| Skin                                | <input type="checkbox"/> Abnormal<br><input type="checkbox"/> Normal<br><input type="checkbox"/> Not done |                                  |
| Endocrine                           | <input type="checkbox"/> Abnormal<br><input type="checkbox"/> Normal<br><input type="checkbox"/> Not done |                                  |
| Ear-nose-throat system              | <input type="checkbox"/> Abnormal<br><input type="checkbox"/> Normal<br><input type="checkbox"/> Not done |                                  |
| Ophthalmological system             | <input type="checkbox"/> Abnormal<br><input type="checkbox"/> Normal<br><input type="checkbox"/> Not done |                                  |
| Gastrointestinal system             | <input type="checkbox"/> Abnormal<br><input type="checkbox"/> Normal<br><input type="checkbox"/> Not done |                                  |
| Others<br>.....                     | <input type="checkbox"/> Abnormal<br><input type="checkbox"/> Normal<br><input type="checkbox"/> Not done |                                  |

**VITAL SIGNS**

| SITTING BLOOD PRESSURE<br>(mmHg) |           | SITTING HEART RATE<br>(bpm) |
|----------------------------------|-----------|-----------------------------|
| Systolic                         | Diastolic |                             |
|                                  |           |                             |

Centre No. |\_\_|\_\_|\_\_|\_\_| Screen. No. |\_\_|\_\_|\_\_|\_\_| Randomisation No. |\_\_|\_\_|\_\_|\_\_| Pat. Init. |\_\_|\_\_|\_\_|\_\_|\_\_|\_\_|  
Family name Name

## VISIT 7 – Day 180

Visit date |\_\_|\_\_|\_\_|\_\_|\_\_|\_\_| at |\_\_|\_\_|\_\_|\_\_|  
D D M M Y Y HOUR MINUTES

### Pro-calcitonin (pro-ct)

Has the blood sample been taken for the pro-ct analysis?

Yes No

If Yes, refer to the Study Procedures Handbook for handling and storage.

If No, please specify why: \_\_\_\_\_

Please fill in as soon as the results are available:

Pro-calcitonin (mcg/L) |\_\_|\_\_|\_\_|\_\_|

### C-reactive protein (CRP), serum amyloid (SAA) and RANTES

Has the blood sample been taken for the CRP, SAA and RANTES analysis?

Yes No

If Yes, refer to the Study Procedures Handbook for handling and storage.

If No, please specify why: \_\_\_\_\_

Please fill in as soon as the results are available:

CRP (mg/L) |\_\_|\_\_|\_\_|\_\_|

SAA (mg/L) |\_\_|\_\_|\_\_|\_\_|

RANTES (mcg/L) |\_\_|\_\_|\_\_|\_\_|



Centre No. |\_\_|\_\_|\_\_|\_\_| Screen. No. |\_\_|\_\_|\_\_|\_\_| Randomisation No. |\_\_|\_\_|\_\_|\_\_| Pat. Init. |\_\_|\_\_|\_\_|\_\_|  
Family name Name

## VISIT 7 – Day 180

Visit date |\_\_|\_\_|\_\_|\_\_|\_\_|\_\_|\_\_|\_\_|\_\_|\_\_| at |\_\_|\_\_|\_\_|\_\_|\_\_|\_\_|  
D D M M Y Y HOUR MINUTES

### QUESTIONNAIRES FOR RESPIRATORY SYMPTOMS/QUALITY OF LIFE

SF36 score: total |\_\_|\_\_|\_\_|\_\_|  
 BDI score: total |\_\_|\_\_|\_\_|\_\_|  
 TDI score: total |\_\_|\_\_|\_\_|\_\_|  
 CCIQ Score: total |\_\_|\_\_|\_\_|\_\_|

### PHARMACOECONOMIC QUESTIONNAIRE

Please remind to fill in the pharmacoeconomic questionnaire and enclose it in the plastic envelope.

### SPIROMETRY

- For this visit, please obtain a **complete spirometry**.
- SPIROMETRY:** from 3 acceptable spirometric manoeuvres record the highest FEV<sub>1</sub> and FVC, irrespective of the manoeuvre (curve) they come from.

date |\_\_|\_\_|\_\_|\_\_|\_\_|\_\_| at |\_\_|\_\_|\_\_|\_\_|\_\_|\_\_|  
HOUR MINUTES

|                                                   |                                          |
|---------------------------------------------------|------------------------------------------|
| <b>FVC</b>                                        | __ ,  __ __ __ __  litre                 |
| <b>FEV<sub>1</sub></b>                            | __ ,  __ __ __ __  litre                 |
| <b>FEV<sub>1</sub> predicted normal value</b>     | __ ,  __ __ __ __  litre [ERS standards] |
| <b>FEV<sub>1</sub> (% predicted normal value)</b> | __ __  % of predicted value              |
| <b>FEV<sub>1</sub>/FVC (%)</b>                    | __ __ __ ,  __  %                        |
| <b>RV</b>                                         | __ ,  __ __ __ __  litre                 |
| <b>RV (% predicted normal value)</b>              | __ __ __ ,  __  %                        |
| <b>TLC</b>                                        | __ ,  __ __ __ __  litre                 |
| <b>TLC (% predicted normal value)</b>             | __ __ __ ,  __  %                        |
| <b>RV/TLC (%)</b>                                 | __ __ __ ,  __  %                        |
| <b>KCO</b>                                        | __ __ ,  __ __  ml/min/mmHg/l            |
| <b>KCO (% predicted normal value)</b>             | __ __ __ ,  __  %                        |

**VISIT 7 – Day 180**

Visit date |\_\_|\_\_|\_\_|\_\_|\_\_|\_\_|\_\_|\_\_|\_\_|\_\_| at |\_\_|\_\_|\_\_|\_\_|\_\_|\_\_|  
D D M M Y Y HOUR MINUTES

**MICROBIOLOGY**

Sputum collection performed: Yes No

If YES, specify volume of sputum collected: |\_\_|,|\_\_| ml

If NO, specify why \_\_\_\_\_

Results from local laboratory:

**Bacteriology:**

Identified microorganism #1: \_\_\_\_\_ CFU/ml: |\_\_|\_\_|\_\_|\_\_|

Identified microorganism #2: \_\_\_\_\_ CFU/ml: |\_\_|\_\_|\_\_|\_\_|

Identified microorganism #3: \_\_\_\_\_ CFU/ml: |\_\_|\_\_|\_\_|\_\_|

**Serology for Intracellular pathogens:**

Has the sample for serology for intracellular pathogens been obtained? Yes  No

**If Yes, please complete below:**

Was serology positive for **Mycoplasma pneumoniae**? Yes  No

If YES, indicate: IgM: |\_\_|\_\_|\_\_|,|\_\_|\_\_|\_\_|  
 IgG: |\_\_|\_\_|\_\_|,|\_\_|\_\_|\_\_|

Was serology positive for **Chlamydia**? Yes  No

If YES, indicate: IgM: |\_\_|\_\_|\_\_|,|\_\_|\_\_|\_\_|  
 IgG: |\_\_|\_\_|\_\_|,|\_\_|\_\_|\_\_|

Was serology positive for **Legionella pneumophila**? Yes  No

If YES, indicate:

|                            | POSITIVE                 | NEGATIVE                 |
|----------------------------|--------------------------|--------------------------|
| Legionella pneumophila IgM | <input type="checkbox"/> | <input type="checkbox"/> |
| Legionella pneumophila IgG | <input type="checkbox"/> | <input type="checkbox"/> |

Centre No. |\_\_|\_\_|\_\_|\_\_| Screen. No. |\_\_|\_\_|\_\_|\_\_| Randomisation No. |\_\_|\_\_|\_\_|\_\_| Pat. Init. |\_\_|\_\_|\_\_|\_\_|  
Family name Name

## VISIT 7 – Day 180

Visit date |\_\_|\_\_|\_\_|\_\_|\_\_|\_\_|\_\_|\_\_|\_\_|\_\_| at |\_\_|\_\_|\_\_|\_\_|\_\_|\_\_|  
D D M M Y Y HOUR MINUTES

### MICROBIOLOGY (continued)

Has the sample for **respiratory viruses RT-PCR analysis** been collected and stored at  $-80^{\circ}\text{C}$ ?

Yes  No

If **YES**, specify volume stored at  $-80^{\circ}\text{C}$  for RT-PCR: |\_\_|,|\_\_|\_\_|\_\_| ml

*Please remember to label the sample with the patient's ID number and store it at  $-80^{\circ}\text{C}$ , as described in the Study Procedures Handbook.*

Has the sample for **inflammatory cell counts** been collected? Yes  No

Were the slides prepared and stored at  $-20^{\circ}\text{C}$ ? Yes  No

If YES: how many slides were prepared? |\_\_|\_\_|

**VISIT 7 – Day 180**

Visit date |\_\_|\_\_|\_\_|\_\_|\_\_|\_\_|\_\_|\_\_|\_\_|\_\_| at |\_\_|\_\_|\_\_|\_\_|\_\_|\_\_|  
D D M M Y Y HOUR MINUTES

**ARTERIAL BLOOD GASES**

|                                                                    | Yes                      | No                       |
|--------------------------------------------------------------------|--------------------------|--------------------------|
| Arterial blood gas analysis performed:                             | <input type="checkbox"/> | <input type="checkbox"/> |
| <b>If YES:</b> patient was under O <sub>2</sub> therapy?           | <input type="checkbox"/> | <input type="checkbox"/> |
| <b>If patient was under O<sub>2</sub> therapy</b> please indicate: |                          |                          |
| - how many L/min:  __ , __                                         |                          |                          |
| - how many hours/day:  __ __                                       |                          |                          |

If arterial blood gas analysis was performed, indicate:

pH: |\_\_|,|\_\_|\_\_|  
 PaO<sub>2</sub>: |\_\_|\_\_|\_\_| mmHg  
 PaCO<sub>2</sub>: |\_\_|\_\_|\_\_| mmHg  
 SO<sub>2</sub>: |\_\_|\_\_|\_\_| %  
 HCO<sub>3</sub><sup>-</sup>: |\_\_|\_\_|\_\_| mmol/L

**INVESTIGATOR'S STATEMENT**

I confirm that the data herein is a true complete and accurate reflection of this subject participation in the study, according to the protocol procedures.

Investigator's name: .....

Investigator's signature: .....

Date: |\_\_|\_\_|\_\_|\_\_|\_\_|\_\_|\_\_|\_\_|\_\_|\_\_|  
D D M M Y Y

## ADVERSE EVENT(S) REPORT FORM

### SECTION A

| ADVERSE EVENT, SPECIFY<br><small>Please, list ONE event per line</small> | SERIOUS<br>1. No<br>2. Yes                               | REASON (several statements are possible)<br>1. Fatal<br>2. Life-threatening<br>3. Inpatient hospitalisation or prolonged inpatient hospitalisation<br>4. Permanent or significant disability / Incapacity<br>5. Congenital anomaly / Birth defect<br>6. May require medical intervention to prevent the above outcomes | DATE OF ONSET<br><small>(dd mm yy)</small> | DATE OF END<br><small>(dd mm yy)</small> | SEVERITY<br>1. Mild<br>2. Moderate<br>3. Severe                                     | RELATIONSHIP<br>1. Certain/Definite<br>2. Probable/Likely<br>3. Possible<br>4. Doubtful/Unlikely<br>5. Not available<br>6. Not assessable<br>7. Not related                                     | ACTION TAKEN (several statements are possible)<br>1. None<br>2. Drug treatment<br>3. Discontinuation of study drug(s)<br>4. Discontinuation of concomitant drug(s) | OUTCOME OF EVENT<br>1. Recovered<br>2. Recovered with sequelae<br>3. Not yet recovered<br>4. Death: drug may be contributory<br>5. Death: due to adverse event<br>6. Death: unrelated to drug<br>7. Unknown |
|--------------------------------------------------------------------------|----------------------------------------------------------|------------------------------------------------------------------------------------------------------------------------------------------------------------------------------------------------------------------------------------------------------------------------------------------------------------------------|--------------------------------------------|------------------------------------------|-------------------------------------------------------------------------------------|-------------------------------------------------------------------------------------------------------------------------------------------------------------------------------------------------|--------------------------------------------------------------------------------------------------------------------------------------------------------------------|-------------------------------------------------------------------------------------------------------------------------------------------------------------------------------------------------------------|
| 1.                                                                       | 1 2<br><input type="checkbox"/> <input type="checkbox"/> | 1 2 3 4 5 6<br><input type="checkbox"/> <input type="checkbox"/> <input type="checkbox"/> <input type="checkbox"/> <input type="checkbox"/> <input type="checkbox"/>                                                                                                                                                   | _/_/_                                      | _/_/_                                    | 1 2 3<br><input type="checkbox"/> <input type="checkbox"/> <input type="checkbox"/> | 1 2 3 4 5 6 7<br><input type="checkbox"/> <input type="checkbox"/> <input type="checkbox"/> <input type="checkbox"/> <input type="checkbox"/> <input type="checkbox"/> <input type="checkbox"/> | 1 2 3 4<br><input type="checkbox"/> <input type="checkbox"/> <input type="checkbox"/> <input type="checkbox"/>                                                     | 1 2 3 4 5 6 7<br><input type="checkbox"/> <input type="checkbox"/> <input type="checkbox"/> <input type="checkbox"/> <input type="checkbox"/> <input type="checkbox"/> <input type="checkbox"/>             |
| 2.                                                                       | 1 2<br><input type="checkbox"/> <input type="checkbox"/> | 1 2 3 4 5 6<br><input type="checkbox"/> <input type="checkbox"/> <input type="checkbox"/> <input type="checkbox"/> <input type="checkbox"/> <input type="checkbox"/>                                                                                                                                                   | _/_/_                                      | _/_/_                                    | 1 2 3<br><input type="checkbox"/> <input type="checkbox"/> <input type="checkbox"/> | 1 2 3 4 5 6 7<br><input type="checkbox"/> <input type="checkbox"/> <input type="checkbox"/> <input type="checkbox"/> <input type="checkbox"/> <input type="checkbox"/> <input type="checkbox"/> | 1 2 3 4<br><input type="checkbox"/> <input type="checkbox"/> <input type="checkbox"/> <input type="checkbox"/>                                                     | 1 2 3 4 5 6 7<br><input type="checkbox"/> <input type="checkbox"/> <input type="checkbox"/> <input type="checkbox"/> <input type="checkbox"/> <input type="checkbox"/> <input type="checkbox"/>             |
| 3.                                                                       | 1 2<br><input type="checkbox"/> <input type="checkbox"/> | 1 2 3 4 5 6<br><input type="checkbox"/> <input type="checkbox"/> <input type="checkbox"/> <input type="checkbox"/> <input type="checkbox"/> <input type="checkbox"/>                                                                                                                                                   | _/_/_                                      | _/_/_                                    | 1 2 3<br><input type="checkbox"/> <input type="checkbox"/> <input type="checkbox"/> | 1 2 3 4 5 6 7<br><input type="checkbox"/> <input type="checkbox"/> <input type="checkbox"/> <input type="checkbox"/> <input type="checkbox"/> <input type="checkbox"/> <input type="checkbox"/> | 1 2 3 4<br><input type="checkbox"/> <input type="checkbox"/> <input type="checkbox"/> <input type="checkbox"/>                                                     | 1 2 3 4 5 6 7<br><input type="checkbox"/> <input type="checkbox"/> <input type="checkbox"/> <input type="checkbox"/> <input type="checkbox"/> <input type="checkbox"/> <input type="checkbox"/>             |
| 4.                                                                       | 1 2<br><input type="checkbox"/> <input type="checkbox"/> | 1 2 3 4 5 6<br><input type="checkbox"/> <input type="checkbox"/> <input type="checkbox"/> <input type="checkbox"/> <input type="checkbox"/> <input type="checkbox"/>                                                                                                                                                   | _/_/_                                      | _/_/_                                    | 1 2 3<br><input type="checkbox"/> <input type="checkbox"/> <input type="checkbox"/> | 1 2 3 4 5 6 7<br><input type="checkbox"/> <input type="checkbox"/> <input type="checkbox"/> <input type="checkbox"/> <input type="checkbox"/> <input type="checkbox"/> <input type="checkbox"/> | 1 2 3 4<br><input type="checkbox"/> <input type="checkbox"/> <input type="checkbox"/> <input type="checkbox"/>                                                     | 1 2 3 4 5 6 7<br><input type="checkbox"/> <input type="checkbox"/> <input type="checkbox"/> <input type="checkbox"/> <input type="checkbox"/> <input type="checkbox"/> <input type="checkbox"/>             |
| 5.                                                                       | 1 2<br><input type="checkbox"/> <input type="checkbox"/> | 1 2 3 4 5 6<br><input type="checkbox"/> <input type="checkbox"/> <input type="checkbox"/> <input type="checkbox"/> <input type="checkbox"/> <input type="checkbox"/>                                                                                                                                                   | _/_/_                                      | _/_/_                                    | 1 2 3<br><input type="checkbox"/> <input type="checkbox"/> <input type="checkbox"/> | 1 2 3 4 5 6 7<br><input type="checkbox"/> <input type="checkbox"/> <input type="checkbox"/> <input type="checkbox"/> <input type="checkbox"/> <input type="checkbox"/> <input type="checkbox"/> | 1 2 3 4<br><input type="checkbox"/> <input type="checkbox"/> <input type="checkbox"/> <input type="checkbox"/>                                                     | 1 2 3 4 5 6 7<br><input type="checkbox"/> <input type="checkbox"/> <input type="checkbox"/> <input type="checkbox"/> <input type="checkbox"/> <input type="checkbox"/> <input type="checkbox"/>             |

**FILL IN THE REASON FOR SERIOUSNESS AND THE COMPLEMENTARY PAGE FOR SERIOUS ADVERSE EVENTS AND REPORT BOTH PAGES TO CROM AND THE DIREZIONE SANITARIA OF THE HOSPITAL WITHIN A WORKING DAY (SEE STUDY PROCEDURES HANDBOOK FOR INSTRUCTIONS).**

Date: \_\_\_/\_\_\_/\_\_\_

Investigator's Signature: \_\_\_\_\_

Centre No. | | | | Screening No. | | | | Randomisation No. | | | | Visit No. | | | Patient's Initials | | | | | | | |  
Family name Name

**COMPLEMENTARY PAGE FOR THE SERIOUS ADVERSE EVENT(S)**

**SECTION B**

**FURTHER DETAILS OF ADVERSE EVENT**

|                                                                                           |                                                                                |                                                 |                                 |                    |                                                                             |
|-------------------------------------------------------------------------------------------|--------------------------------------------------------------------------------|-------------------------------------------------|---------------------------------|--------------------|-----------------------------------------------------------------------------|
| <b>REPORT TYPE</b><br>Initial <input type="checkbox"/> Follow-up <input type="checkbox"/> | <b>CODE BROKEN</b><br>Yes <input type="checkbox"/> No <input type="checkbox"/> | <b>COUNTRY WHERE THE ADVERSE EVENT OCCURRED</b> | <b>DATE OF BIRTH (dd/mm/yy)</b> | <b>AGE (years)</b> | <b>SEX</b><br>Male <input type="checkbox"/> Female <input type="checkbox"/> |
|-------------------------------------------------------------------------------------------|--------------------------------------------------------------------------------|-------------------------------------------------|---------------------------------|--------------------|-----------------------------------------------------------------------------|

|                               |                        |
|-------------------------------|------------------------|
| <b>CONCOMITANT DISEASE(S)</b> | <b>MEDICAL HISTORY</b> |
|-------------------------------|------------------------|

| SUSPECTED DRUG(S) | Indication for use | Daily dose | Route of administration | Treatment dates (dd/mm/yyyy)    | Comments |
|-------------------|--------------------|------------|-------------------------|---------------------------------|----------|
|                   |                    |            |                         | From ___/___/___ To ___/___/___ |          |
|                   |                    |            |                         | From ___/___/___ To ___/___/___ |          |

|                                    |                                                                                                                                 |                                                                                                                                          |                                                                                                                                |                                                                                                                                     |
|------------------------------------|---------------------------------------------------------------------------------------------------------------------------------|------------------------------------------------------------------------------------------------------------------------------------------|--------------------------------------------------------------------------------------------------------------------------------|-------------------------------------------------------------------------------------------------------------------------------------|
| <b>DECHALLENGE AND RECHALLENGE</b> | Did suspect study drug (s) discontinue?<br>Yes <input type="checkbox"/> No <input type="checkbox"/> NA <input type="checkbox"/> | Did reaction abate after stopping study drug(s)?<br>Yes <input type="checkbox"/> No <input type="checkbox"/> NA <input type="checkbox"/> | Was/were study drug(s) readministered?<br>Yes <input type="checkbox"/> No <input type="checkbox"/> NA <input type="checkbox"/> | Did reaction reappear after reintroduction?<br>Yes <input type="checkbox"/> No <input type="checkbox"/> NA <input type="checkbox"/> |
|------------------------------------|---------------------------------------------------------------------------------------------------------------------------------|------------------------------------------------------------------------------------------------------------------------------------------|--------------------------------------------------------------------------------------------------------------------------------|-------------------------------------------------------------------------------------------------------------------------------------|

| CONCOMITANT MEDICATION(S)<br>(Tradename/Generic name) | Indication for use | Daily dose | Route of administration | Treatment dates (dd/mm/yyyy)    | Comments |
|-------------------------------------------------------|--------------------|------------|-------------------------|---------------------------------|----------|
|                                                       |                    |            |                         | From ___/___/___ To ___/___/___ |          |
|                                                       |                    |            |                         | From ___/___/___ To ___/___/___ |          |

|                                                                                                                                                                                                                                                                                     |                                                                                                                                                                                                                                                                                   |
|-------------------------------------------------------------------------------------------------------------------------------------------------------------------------------------------------------------------------------------------------------------------------------------|-----------------------------------------------------------------------------------------------------------------------------------------------------------------------------------------------------------------------------------------------------------------------------------|
| <b>POSSIBLE EXPLANATION(S) FOR SERIOUS ADVERSE EVENT</b><br><input type="checkbox"/> Underlying disease <input type="checkbox"/> Intercurrent disease <input type="checkbox"/> Study drug<br><input type="checkbox"/> Concomitant disease <input type="checkbox"/> Concomitant drug | <b>IN CASE OF OUTCOME "DEATH"</b> attach copy of hospital report, autopsy report, death certificate, if available):<br>Date of death (dd/mm/yy): ___/___/___<br><input type="checkbox"/> Natural course of disease <input type="checkbox"/> Other, please specify: _____<br>_____ |
|-------------------------------------------------------------------------------------------------------------------------------------------------------------------------------------------------------------------------------------------------------------------------------------|-----------------------------------------------------------------------------------------------------------------------------------------------------------------------------------------------------------------------------------------------------------------------------------|

Date: \_\_\_/\_\_\_/\_\_\_

Investigator's Signature: \_\_\_\_\_

Centre No. | | | | Screening No. | | | | Randomisation No. | | | | Visit No. | | | Patient's Initials | | | | | | | |  
Family name Name

**COMPLEMENTARY PAGE FOR THE SERIOUS ADVERSE EVENT(S)**

**SECTION B**

**FURTHER DETAILS OF ADVERSE EVENT**

|                                                                                           |                                                                                |                                                 |                                 |                    |                                                                             |
|-------------------------------------------------------------------------------------------|--------------------------------------------------------------------------------|-------------------------------------------------|---------------------------------|--------------------|-----------------------------------------------------------------------------|
| <b>REPORT TYPE</b><br>Initial <input type="checkbox"/> Follow-up <input type="checkbox"/> | <b>CODE BROKEN</b><br>Yes <input type="checkbox"/> No <input type="checkbox"/> | <b>COUNTRY WHERE THE ADVERSE EVENT OCCURRED</b> | <b>DATE OF BIRTH (dd/mm/yy)</b> | <b>AGE (years)</b> | <b>SEX</b><br>Male <input type="checkbox"/> Female <input type="checkbox"/> |
|-------------------------------------------------------------------------------------------|--------------------------------------------------------------------------------|-------------------------------------------------|---------------------------------|--------------------|-----------------------------------------------------------------------------|

|                               |                        |
|-------------------------------|------------------------|
| <b>CONCOMITANT DISEASE(S)</b> | <b>MEDICAL HISTORY</b> |
|-------------------------------|------------------------|

| SUSPECTED DRUG(S) | Indication for use | Daily dose | Route of administration | Treatment dates (dd/mm/yyyy)    | Comments |
|-------------------|--------------------|------------|-------------------------|---------------------------------|----------|
|                   |                    |            |                         | From ___/___/___ To ___/___/___ |          |
|                   |                    |            |                         | From ___/___/___ To ___/___/___ |          |

|                                    |                                                                                                                                 |                                                                                                                                          |                                                                                                                                |                                                                                                                                     |
|------------------------------------|---------------------------------------------------------------------------------------------------------------------------------|------------------------------------------------------------------------------------------------------------------------------------------|--------------------------------------------------------------------------------------------------------------------------------|-------------------------------------------------------------------------------------------------------------------------------------|
| <b>DECHALLENGE AND RECHALLENGE</b> | Did suspect study drug (s) discontinue?<br>Yes <input type="checkbox"/> No <input type="checkbox"/> NA <input type="checkbox"/> | Did reaction abate after stopping study drug(s)?<br>Yes <input type="checkbox"/> No <input type="checkbox"/> NA <input type="checkbox"/> | Was/were study drug(s) readministered?<br>Yes <input type="checkbox"/> No <input type="checkbox"/> NA <input type="checkbox"/> | Did reaction reappear after reintroduction?<br>Yes <input type="checkbox"/> No <input type="checkbox"/> NA <input type="checkbox"/> |
|------------------------------------|---------------------------------------------------------------------------------------------------------------------------------|------------------------------------------------------------------------------------------------------------------------------------------|--------------------------------------------------------------------------------------------------------------------------------|-------------------------------------------------------------------------------------------------------------------------------------|

| CONCOMITANT MEDICATION(S)<br>(Tradename/Generic name) | Indication for use | Daily dose | Route of administration | Treatment dates (dd/mm/yyyy)    | Comments |
|-------------------------------------------------------|--------------------|------------|-------------------------|---------------------------------|----------|
|                                                       |                    |            |                         | From ___/___/___ To ___/___/___ |          |
|                                                       |                    |            |                         | From ___/___/___ To ___/___/___ |          |

|                                                                                                                                                                                                                                                                                     |                                                                                                                                                                                                                                                                          |
|-------------------------------------------------------------------------------------------------------------------------------------------------------------------------------------------------------------------------------------------------------------------------------------|--------------------------------------------------------------------------------------------------------------------------------------------------------------------------------------------------------------------------------------------------------------------------|
| <b>POSSIBLE EXPLANATION(S) FOR SERIOUS ADVERSE EVENT</b><br><input type="checkbox"/> Underlying disease <input type="checkbox"/> Intercurrent disease <input type="checkbox"/> Study drug<br><input type="checkbox"/> Concomitant disease <input type="checkbox"/> Concomitant drug | <b>IN CASE OF OUTCOME "DEATH"</b> attach copy of hospital report, autopsy report, death certificate, if available):<br>Date of death (dd/mm/yy): ___/___/___<br><input type="checkbox"/> Natural course of disease <input type="checkbox"/> Other, please specify: _____ |
|-------------------------------------------------------------------------------------------------------------------------------------------------------------------------------------------------------------------------------------------------------------------------------------|--------------------------------------------------------------------------------------------------------------------------------------------------------------------------------------------------------------------------------------------------------------------------|

Date: \_\_\_/\_\_\_/\_\_\_

Investigator's Signature: \_\_\_\_\_

Centre No. | | | | Screening No. | | | | Randomisation No. | | | | Visit No. | | | Patient's Initials | | | | | | | |  
Family name Name

**COMPLEMENTARY PAGE FOR THE SERIOUS ADVERSE EVENT(S)**

**SECTION B**

|                                                                                                                                                                                                                                                                                     |  |                                                                                                                                 |                    |                                                                                                                                                                                                                                                                             |                                                                             |                                                                                                                                     |
|-------------------------------------------------------------------------------------------------------------------------------------------------------------------------------------------------------------------------------------------------------------------------------------|--|---------------------------------------------------------------------------------------------------------------------------------|--------------------|-----------------------------------------------------------------------------------------------------------------------------------------------------------------------------------------------------------------------------------------------------------------------------|-----------------------------------------------------------------------------|-------------------------------------------------------------------------------------------------------------------------------------|
| <b>FURTHER DETAILS OF ADVERSE EVENT</b>                                                                                                                                                                                                                                             |  |                                                                                                                                 |                    |                                                                                                                                                                                                                                                                             |                                                                             |                                                                                                                                     |
| <b>REPORT TYPE</b><br>Initial <input type="checkbox"/> Follow-up <input type="checkbox"/>                                                                                                                                                                                           |  | <b>CODE BROKEN</b><br>Yes <input type="checkbox"/> No <input type="checkbox"/>                                                  |                    | <b>COUNTRY WHERE THE ADVERSE EVENT OCCURRED</b>                                                                                                                                                                                                                             |                                                                             | <b>DATE OF BIRTH (dd/mm/yy)</b>                                                                                                     |
|                                                                                                                                                                                                                                                                                     |  |                                                                                                                                 | <b>AGE (years)</b> |                                                                                                                                                                                                                                                                             | <b>SEX</b><br>Male <input type="checkbox"/> Female <input type="checkbox"/> |                                                                                                                                     |
| <b>CONCOMITANT DISEASE(S)</b>                                                                                                                                                                                                                                                       |  |                                                                                                                                 |                    | <b>MEDICAL HISTORY</b>                                                                                                                                                                                                                                                      |                                                                             |                                                                                                                                     |
| <b>SUSPECTED DRUG(S)</b>                                                                                                                                                                                                                                                            |  | Indication for use                                                                                                              |                    | Daily dose                                                                                                                                                                                                                                                                  | Route of administration                                                     | Treatment dates (dd/mm/yyyy)<br>From ___/___/___ To ___/___/___                                                                     |
|                                                                                                                                                                                                                                                                                     |  |                                                                                                                                 |                    |                                                                                                                                                                                                                                                                             |                                                                             | From ___/___/___ To ___/___/___                                                                                                     |
|                                                                                                                                                                                                                                                                                     |  |                                                                                                                                 |                    |                                                                                                                                                                                                                                                                             |                                                                             | From ___/___/___ To ___/___/___                                                                                                     |
| <b>DECHALLENGE AND RECHALLENGE</b>                                                                                                                                                                                                                                                  |  | Did suspect study drug (s) discontinue?<br>Yes <input type="checkbox"/> No <input type="checkbox"/> NA <input type="checkbox"/> |                    | Did reaction abate after stopping study drug(s)?<br>Yes <input type="checkbox"/> No <input type="checkbox"/> NA <input type="checkbox"/>                                                                                                                                    |                                                                             | Was/were study drug(s) readministered?<br>Yes <input type="checkbox"/> No <input type="checkbox"/> NA <input type="checkbox"/>      |
|                                                                                                                                                                                                                                                                                     |  |                                                                                                                                 |                    |                                                                                                                                                                                                                                                                             |                                                                             | Did reaction reappear after reintroduction?<br>Yes <input type="checkbox"/> No <input type="checkbox"/> NA <input type="checkbox"/> |
| <b>CONCOMITANT MEDICATION(S)</b><br>(Tradename/Generic name)                                                                                                                                                                                                                        |  | Indication for use                                                                                                              |                    | Daily dose                                                                                                                                                                                                                                                                  | Route of administration                                                     | Treatment dates (dd/mm/yyyy)<br>From ___/___/___ To ___/___/___                                                                     |
|                                                                                                                                                                                                                                                                                     |  |                                                                                                                                 |                    |                                                                                                                                                                                                                                                                             |                                                                             | From ___/___/___ To ___/___/___                                                                                                     |
|                                                                                                                                                                                                                                                                                     |  |                                                                                                                                 |                    |                                                                                                                                                                                                                                                                             |                                                                             | From ___/___/___ To ___/___/___                                                                                                     |
| <b>POSSIBLE EXPLANATION(S) FOR SERIOUS ADVERSE EVENT</b><br><input type="checkbox"/> Underlying disease <input type="checkbox"/> Intercurrent disease <input type="checkbox"/> Study drug<br><input type="checkbox"/> Concomitant disease <input type="checkbox"/> Concomitant drug |  |                                                                                                                                 |                    | <b>IN CASE OF OUTCOME "DEATH"</b> attach copy of hospital report, autopsy report, death certificate, if available):<br>Date of death (dd/mm/yy): ___/___/___<br><input type="checkbox"/> Natural course of disease <input type="checkbox"/> Other, please specify:<br>_____ |                                                                             |                                                                                                                                     |

Date: \_\_\_/\_\_\_/\_\_\_

Investigator's Signature: \_\_\_\_\_



## STUDY CONCLUSION SUMMARY/WITHDRAWAL/DROP-OUT FORM

Did the patient complete the study?       Yes       No

Date of last study treatment (antibiotic) intake: |\_\_|\_\_|\_\_|\_\_|  
D D M M Y Y

**If Yes:**    Date of study completion: |\_\_|\_\_|\_\_|\_\_|  
D D M M Y Y

**If No:**    - Date of withdrawal: |\_\_|\_\_|\_\_|\_\_|  
D D M M Y Y

- Reason for the withdrawal:

- Did not satisfy all inclusion/exclusion criteria        
     Specify: .....
- Protocol violation        
     Specify: .....
- Adverse event (noted on adverse event page)
- Death        
     Specify cause of death: .....
- Withdrawal of consent
- Pregnancy
- Insufficient therapeutic response
- Lost to follow-up visit
- Poor compliance
- Other reason(s)        
     Specify: .....

## INVESTIGATOR'S STATEMENT

I confirm that the data herein is a true complete and accurate reflection of this subject participation in the study, according to the protocol procedures.

Investigator's name: .....

Investigator's signature: .....

Date: |\_\_|\_\_|\_\_|\_\_|  
D D M M Y Y
