# Supplementary material for: Antibiotic Treatment of Severe Exacerbations of Chronic Obstructive Pulmonary Disease with Procalcitonin: A Randomized Noninferiority Trial
Source: PubMed Central journal article supplement (PMC4356612; doi:10.1371/journal.pone.0118241), 2015-03-11
Supplement: pone.0118241.s008.pdf [file pone.0118241.s008.pdf]

S4 table COMPARISON OF A SERUM PROCALCITONIN GUIDED TREATMENT PLAN WITH THE STANDARD GUIDELINE RECOMMENDED ANTIBIOTIC TREATMENT PLAN FOR PATIENTS HOSPITALIZED WITH A DIAGNOSIS OF EXACERBATION OF COPD

| <b>Center</b>    | <b>No. of screened patients by center</b> |
|------------------|-------------------------------------------|
| 1 Modena         | 19                                        |
| 2 Bassano        | 2                                         |
| 3 Genova         | 18                                        |
| 4 Milano         | 0                                         |
| 5 Trieste        | 9                                         |
| 6 Catania        | 16                                        |
| 7 Bolzano        | 4                                         |
| 8 Foggia         | 26                                        |
| 9 Napoli         | 18                                        |
| 10 Parma         | 6                                         |
| 11 Pisa          | 14                                        |
| 12 Ferrara       | 9                                         |
| 13 Firenze       | 0                                         |
| 14 Pavia         | 8                                         |
| 15 Bergamo       | 0                                         |
| 16 Cassano Murge | 17                                        |
| 17 Reggio Emilia | 17                                        |
| 18 Padova        | 0                                         |
